# Supplementary material for: The impact of serotype-specific vaccination on phylodynamic parameters of Streptococcus pneumoniae and the pneumococcal pan-genome
Source: PLoS Pathog. 2018 Apr 4;14(4):e1006966. doi: 10.1371/journal.ppat.1006966 (PMC5902063; doi:10.1371/journal.ppat.1006966)
Supplement: S1 Table — (XLSX) [file ppat.1006966.s017.xlsx]

## Sheet: TableInfo
FinalName	Accession	Total Length	No Contigs	Avg Contig Length	Largest Contig	N50	Contigs in N50	BAPS1	BAPS2	Sero	Serogroup	MLST	Vaccine	PCV7.actual	PMEM	BEASTdate	Year	Epoch1	Epoch2	agegrp	AgeCat
ERR906946_G1_23F_1999	ERR906946	2047931	15	136529	661271	613758	2	09	09	23F	23	33	PCV7	VT		1999.1	1999	E1	E1B	12-<24m	Pd
ERR906947_G3_19A_2007	ERR906947	2098651	27	77727.8	340965	137426	6	04	04B	19F	19		PCV13	NVT		2007.2	2007	E2	E2B	12-<24m	Pd
ERR906949_G5_NT_2010	ERR906949	2162171	65	33264.2	142264	69452	12	01	01	NT	NT	344	NVT	NVT	NorwayNT-42	2010.2	2010	E3	E3A	12-<24m	Pd
ERR906950_G5_19A_2010	ERR906950	2047404	35	58497.3	610078	121060	4	10	10	19A	19	320	PCV13	NVT		2010.3	2010	E3	E3A	6-<12m	Pd
ERR906951_G5_23B_2010	ERR906951	2061510	22	93705	501294	288091	3	09	09	23B	23	1448	NVT	NVT		2010.3	2010	E3	E3A	12-<24m	Pd
ERR906952_G5_15A_2010	ERR906952	2111106	47	44917.2	311548	95363	8	15	15	15A	15	817	NVT	NVT		2010.3	2010	E3	E3A	6-<12m	Pd
ERR906953_G5_19A_2010	ERR906953	2111143	38	55556.4	255880	132187	6	26	26B	19A	19	199	PCV13	NVT		2010.3	2010	E3	E3A	12-<24m	Pd
ERR906954_G5_7C_2010	ERR906954	2064446	33	62559	375499	128129	5	04	04A	7C	7	3162	NVT	NVT		2010.3	2010	E3	E3A	3y	Pd
ERR906955_G5_19A_2010	ERR906955	2108904	36	58580.7	254488	132018	6	26	26B	19A	19	199	PCV13	NVT		2010.4	2010	E3	E3A	12-<24m	Pd
ERR906956_G5_6A_2010	ERR906956	2053144	38	54030.1	279877	118202	7	22	22	6C	6	146	NVT	NVT		2010.4	2010	E3	E3A	4y	Pd
ERR906957_G5_23B_2010	ERR906957	2082528	24	86772	405252	189609	4	09	09	23B	23	1448*	NVT	NVT		2010.4	2010	E3	E3A	12-<24m	Pd
ERR906958_G5_23A_2010	ERR906958	2098550	29	72363.8	309655	147907	5	24	24	23A	23	338	NVT	NVT	Colombia23F-26	2010.4	2010	E3	E3A	2y	Pd
ERR906959_G5_15C_2010	ERR906959	2058962	50	41179.2	194506	92941	8	27	27	15C	15	NF	NVT	NVT		2010.4	2010	E3	E3A	2y	Pd
ERR906960_G5_6A_2010	ERR906960	2054159	40	51354	187221	93687	9	22	22	6C	6	146	NVT	NVT		2010.4	2010	E3	E3A	6-<12m	Pd
ERR906961_G5_22A_2010	ERR906961	2075215	29	71559.1	265987	118109	6	13	13	22A	22	433	NVT	NVT		2010.4	2010	E3	E3A	3y	Pd
ERR906962_G5_11D_2010	ERR906962	2013204	28	71900.1	427144	112699	5	03	03A	11D	11	62	NVT	NVT		2010.5	2010	E3	E3A	<6m	Pd
ERR906963_G5_11D_2010	ERR906963	2013719	29	69438.6	361474	117798	5	03	03A	11D	11	62	NVT	NVT		2010.5	2010	E3	E3A	4y	Pd
ERR906964_G5_23B_2010	ERR906964	2082508	21	99167.1	491040	331175	3	09	09	23B	23	1448	NVT	NVT		2010.6	2010	E3	E3A	4y	Pd
ERR906965_G5_17F_2010	ERR906965	2076228	22	94374	357292	162902	5	06	06B	17F	17	392	NVT	NVT		2010.8	2010	E3	E3A	<6m	Pd
ERR906966_G5_13_2010	ERR906966	2088946	27	77368.4	340926	156215	5	06	06B	13	13	9462	NVT	NVT		2011	2010	E3	E3A	3y	Pd
ERR906967_G5_6A_2010	ERR906967	2053688	40	51342.2	262515	96088	8	22	22	6C	6	146	NVT	NVT		2011	2010	E3	E3A	6-<12m	Pd
ERR906968_G5_38_2011	ERR906968	2120965	76	27907.4	175753	58159	11	27	27	38	38	393	NVT	NVT		2011	2011	E3	E3B	6-<12m	Pd
ERR906969_G5_38_2011	ERR906969	2124930	71	29928.6	175753	52432	12	27	27	38	38	393	NVT	NVT		2011.1	2011	E3	E3B	6-<12m	Pd
ERR906970_G5_NT_2011	ERR906970	2146212	47	45664.1	266962	88665	8	01	01	NT	NT	448	NVT	NVT	USANT-43	2011.1	2011	E3	E3B	6-<12m	Pd
ERR906971_G5_23A_2011	ERR906971	2050573	22	93207.9	343004	202242	4	09	09	23A	23	438	NVT	NVT		2011.2	2011	E3	E3B	4y	Pd
ERR906972_G5_15C_2011	ERR906972	2124344	44	48280.6	224247	114527	7	23	23	15C	15	162	NVT	NVT		2011.2	2011	E3	E3B	<6m	Pd
ERR906973_G5_15C_2011	ERR906973	2167526	56	38705.8	228032	95797	8	23	23	15C	15	162	NVT	NVT		2011.3	2011	E3	E3B	6-<12m	Pd
ERR906974_G5_17F_2011	ERR906974	2074293	31	66912.7	357911	93991	7	06	06B	17F	17	392	NVT	NVT		2011.4	2011	E3	E3B	5y	Pd
ERR906975_G5_17F_2011	ERR906975	2005974	23	87216.3	375940	172330	4	19	19B	17F	17	1794	NVT	NVT		2011.4	2011	E3	E3B	<6m	Pd
ERR906976_G5_13_2011	ERR906976	2126367	31	68592.5	273183	101492	6	06	06B	13	13	9462	NVT	NVT		2011.5	2011	E3	E3B	6-<12m	Pd
ERR906977_G5_35A_2011	ERR906977	2042226	24	85092.8	499858	336339	3	07	07	35A	35	4518	NVT	NVT		2011.5	2011	E3	E3B	3y	Pd
ERR906978_G5_23A_2011	ERR906978	2083873	33	63147.7	290860	129007	6	24	24	23A	23	338	NVT	NVT	Colombia23F-26	2011.5	2011	E3	E3B	12-<24m	Pd
ERR906979_G5_10A_2011	ERR906979	2060468	33	62438.4	237274	119251	7	02	02B	10A	10	1263	NVT	NVT		2011.5	2011	E3	E3B	6-<12m	Pd
ERR906980_G5_31_2011	ERR906980	2041887	39	52356.1	253275	91724	6	05	05	31	31	1111	NVT	NVT		2011.5	2011	E3	E3B	6-<12m	Pd
ERR906981_G5_NT_2011	ERR906981	2164945	68	31837.4	207901	62758	10	01	01	NT	NT	344	NVT	NVT	NorwayNT-42	2011.5	2011	E3	E3B	2y	Pd
ERR906982_G5_NT_2011	ERR906982	2180466	74	29465.8	170941	47174	13	01	01	NT	NT	2315	NVT	NVT		2011.6	2011	E3	E3B	12-<24m	Pd
ERR906983_G5_NT_2011	ERR906983	2172551	80	27156.9	170714	56121	12	01	01	NT	NT	344	NVT	NVT	NorwayNT-42	2011.8	2011	E3	E3B	2y	Pd
ERR906984_G5_35B_2011	ERR906984	2086587	39	53502.2	265778	105726	6	23	23	35B	15	162	NVT	NVT		2011.9	2011	E3	E3B	<6m	Pd
ERR906985_G5_23A_2011	ERR906985	2081328	26	80051.1	305254	191146	5	24	24	23A	23	NF	NVT	NVT		2011.9	2011	E3	E3B	5y	Pd
ERR906986_G5_15C_2011	ERR906986	2079529	32	64985.3	424095	126314	6	25	25	15C	15	3065	NVT	NVT		2011.9	2011	E3	E3B	2y	Pd
ERR906987_G5_35B_2012	ERR906987	2127761	45	47283.6	265778	82917	8	23	23	35B	15	162	NVT	NVT		2012.1	2012	E3	E3B	3y	Pd
ERR906988_G5_22A_2012	ERR906988	2058256	31	66395.4	326641	116451	5	13	13	22A	22	433	NVT	NVT		2012.2	2012	E3	E3B	5y	Pd
ERR906989_G5_35B_2010	ERR906989	2004001	30	66800	173101	89694	8	11	11	35B	35	10063	NVT	NVT		2010.2	2010	E3	E3A	12-<24m	Pd
ERR906990_G5_23A_2010	ERR906990	2131158	32	66598.7	308583	127690	5	24	24	23A	23	338	NVT	NVT	Colombia23F-26	2010.3	2010	E3	E3A	4y	Pd
ERR906991_G5_17F_2010	ERR906991	2009320	21	95681.9	297437	193002	4	19	19B	17F	17	1794	NVT	NVT		2010.3	2010	E3	E3A	12-<24m	Pd
ERR906992_G5_15A_2010	ERR906992	2103797	36	58438.8	251106	92828	7	27	27	15A	15	63	NVT	NVT	Sweden15A-25	2010.3	2010	E3	E3A	12-<24m	Pd
ERR906993_G5_15A_2010	ERR906993	2082749	32	65085.9	309334	105172	5	24	24	15A	15	338	NVT	NVT	Colombia23F-26	2010.3	2010	E3	E3A	5y	Pd
ERR906994_G5_10A_2010	ERR906994	2040361	29	70357.3	660776	153247	4	16	16B	10A	10	816	NVT	NVT		2010.3	2010	E3	E3A	3y	Pd
ERR906995_G5_23B_2010	ERR906995	2078171	28	74220.4	457299	189886	4	09	09	23B	23	1847	NVT	NVT		2010.3	2010	E3	E3A	12-<24m	Pd
ERR906996_G5_5_2010	ERR906996	2121082	44	48206.4	258670	76627	8	21	21	6C	6	473	NVT	NVT		2010.3	2010	E3	E3A	12-<24m	Pd
ERR906997_G5_35B_2010	ERR906997	2079605	31	67084	333228	94674	6	11	11	35B	35	558	NVT	NVT		2010.3	2010	E3	E3A	5y	Pd
ERR906998_G5_7B_2010	ERR906998	2088704	28	74596.6	527789	169112	4	26	26A	7B	7	1757	NVT	NVT		2010.4	2010	E3	E3A	12-<24m	Pd
ERR906999_G5_35B_2010	ERR906999	2004869	32	62652.2	176716	105937	7	11	11	35B	35	558	NVT	NVT		2010.4	2010	E3	E3A	12-<24m	Pd
ERR907000_G5_NT_2010	ERR907000	2167852	56	38711.6	193272	87178	9	01	01	NT	NT	344	NVT	NVT	NorwayNT-42	2010.4	2010	E3	E3A	5y	Pd
ERR907001_G5_35B_2010	ERR907001	2045057	35	58430.2	202941	105934	7	11	11	35B	35	558	NVT	NVT		2010.4	2010	E3	E3A	6-<12m	Pd
ERR907002_G5_19A_2010	ERR907002	2086554	26	80252.1	277512	125125	6	27	27	19A	19	230*	PCV13	NVT		2010.4	2010	E3	E3A	6-<12m	Pd
ERR907003_G5_17F_2010	ERR907003	2006892	24	83620.5	417294	296651	3	19	19B	17F	17	1794	NVT	NVT		2010.4	2010	E3	E3A	12-<24m	Pd
ERR907004_G5_19A_2010	ERR907004	2047054	36	56862.6	658637	117644	4	10	10	19A	19	320	PCV13	NVT		2010.4	2010	E3	E3A	12-<24m	Pd
ERR907005_G5_6A_2010	ERR907005	2090577	42	49775.6	204951	83668	8	22	22	6C	6	146	NVT	NVT		2010.4	2010	E3	E3A	5y	Pd
ERR907006_G5_6A_2010	ERR907006	2053285	38	54033.8	200307	118317	7	22	22	6C	6	146	NVT	NVT		2010.4	2010	E3	E3A	12-<24m	Pd
ERR907007_G5_3_2010	ERR907007	2015108	24	83962.8	420864	178130	4	02	02A	3	3	180	PCV13	NVT	Netherlands3-31	2010.4	2010	E3	E3A	12-<24m	Pd
ERR907008_G5_19A_2010	ERR907008	2046244	37	55303.9	609942	95945	4	10	10	19A	19	320	PCV13	NVT		2010.6	2010	E3	E3A	2y	Pd
ERR907009_G5_15C_2010	ERR907009	2083046	33	63122.6	265064	121367	6	25	25	15C	15	3065	NVT	NVT		2010.7	2010	E3	E3A	6-<12m	Pd
ERR907010_G5_23A_2010	ERR907010	2077308	36	57703	215208	124664	7	24	24	23A	23	NF	NVT	NVT		2010.7	2010	E3	E3A	3y	Pd
ERR907011_G5_23B_2010	ERR907011	2126078	30	70869.3	415353	190250	4	09	09	23B	23	439	NVT	NVT		2010.7	2010	E3	E3A	4y	Pd
ERR907012_G5_35B_2010	ERR907012	2075581	34	61046.5	277218	124311	6	23	23	35B	15	162	NVT	NVT		2010.7	2010	E3	E3A	<6m	Pd
ERR907013_G5_35F_2010	ERR907013	2058662	33	62383.7	339976	130403	5	16	16A	35F	35	498	NVT	NVT		2010.7	2010	E3	E3A	6-<12m	Pd
ERR907014_G5_19A_2010	ERR907014	2102550	31	67824.2	392835	199865	4	26	26B	19A	19	199	PCV13	NVT		2010.8	2010	E3	E3A	<6m	Pd
ERR907015_G5_23A_2010	ERR907015	2076603	28	74164.4	276574	130184	5	24	24	23A	23	338	NVT	NVT	Colombia23F-26	2010.9	2010	E3	E3A	6-<12m	Pd
ERR907016_G5_16F_2010	ERR907016	2134862	36	59301.7	263819	127182	6	14	14	16F	16	1840	NVT	NVT		2010.9	2010	E3	E3A	4y	Pd
ERR907017_G5_17F_2010	ERR907017	2043584	25	81743.4	275585	145200	5	06	06B	17F	17	392	NVT	NVT		2010.9	2010	E3	E3A	2y	Pd
ERR907018_G5_6A_2010	ERR907018	2153676	38	56675.7	281288	162609	5	21	21	6C	6	NF	NVT	NVT		2011	2010	E3	E3A	3y	Pd
ERR907019_G5_23B_2010	ERR907019	2124663	32	66395.7	573115	130046	4	09	09	23B	23	439	NVT	NVT		2011	2010	E3	E3A	3y	Pd
ERR907020_G5_15A_2011	ERR907020	2111098	56	37698.2	195657	74472	9	15	15	15A	15	817	NVT	NVT		2011	2011	E3	E3B	6-<12m	Pd
ERR907021_G5_35F_2011	ERR907021	2093704	38	55097.5	319345	130210	6	16	16A	35F	35	498	NVT	NVT		2011.1	2011	E3	E3B	6-<12m	Pd
ERR907022_G5_3_2011	ERR907022	2015718	20	100786	520972	263455	3	02	02A	3	3	180	PCV13	NVT	Netherlands3-31	2011.1	2011	E3	E3B	5y	Pd
ERR907023_G5_NT_2011	ERR907023	2157198	70	30817.1	143654	58099	12	01	01	NT	NT	344	NVT	NVT	NorwayNT-42	2011.1	2011	E3	E3B	12-<24m	Pd
ERR907024_G5_21_2011	ERR907024	2114695	44	48061.2	177045	100394	9	25	25	21	21	193	NVT	NVT	Greece21-30	2011.1	2011	E3	E3B	6-<12m	Pd
ERR907025_G5_35B_2011	ERR907025	2070108	47	44044.8	382961	89278	7	23	23	35B	15	162	NVT	NVT		2011.2	2011	E3	E3B	6-<12m	Pd
ERR907026_G5_19A_2011	ERR907026	2099912	41	51217.4	298432	148465	5	26	26B	19A	19	199	PCV13	NVT		2011.2	2011	E3	E3B	6-<12m	Pd
ERR907027_G5_23A_2011	ERR907027	2093567	28	74770.2	327287	157386	5	24	24	23A	23	338	NVT	NVT	Colombia23F-26	2011.2	2011	E3	E3B	12-<24m	Pd
ERR907028_G5_31_2011	ERR907028	2038554	46	44316.4	207548	74200	8	05	05	31	31	1111	NVT	NVT		2011.2	2011	E3	E3B	5y	Pd
ERR907029_G5_23A_2011	ERR907029	2039343	33	61798.3	296718	156186	5	24	24	23A	23	338	NVT	NVT	Colombia23F-26	2011.2	2011	E3	E3B	12-<24m	Pd
ERR907030_G5_17F_2011	ERR907030	2074211	32	64819.1	277209	187672	5	19	19B	17F	17	1794	NVT	NVT		2011.2	2011	E3	E3B	6-<12m	Pd
ERR907031_G5_35A_2011	ERR907031	2043272	20	102164	501913	304222	3	07	07	35A	35	4518	NVT	NVT		2011.2	2011	E3	E3B	6-<12m	Pd
ERR907032_G5_31_2011	ERR907032	2042463	39	52370.8	337993	186722	4	05	05	31	31	1111	NVT	NVT		2011.4	2011	E3	E3B	3y	Pd
ERR907033_G5_35B_2011	ERR907033	2075919	34	61056.4	162445	86740	10	11	11	35B	35	558	NVT	NVT		2011.5	2011	E3	E3B	5y	Pd
ERR907034_G5_19A_2011	ERR907034	2076721	39	53249.3	561196	95156	5	10	10	19A	19	320	PCV13	NVT		2011.5	2011	E3	E3B	5y	Pd
ERR907035_G5_10B_2011	ERR907035	2054202	34	60417.7	302868	114584	6	16	16B	10B	10	816	NVT	NVT		2011.6	2011	E3	E3B	3y	Pd
ERR907036_G5_23B_2011	ERR907036	2100511	41	51232	582326	247462	3	09	09	23B	23	1448	NVT	NVT		2011.6	2011	E3	E3B	4y	Pd
ERR907037_G5_38_2011	ERR907037	2124468	66	32188.9	175751	61918	11	27	27	38	38	393	NVT	NVT		2011.8	2011	E3	E3B	4y	Pd
ERR907038_G5_12A_2011	ERR907038	1996119	29	68831.7	425337	146083	5	27	27	12A	12	218	NVT	NVT	Denmark12F-24	2011.8	2011	E3	E3B	4y	Pd
ERR907039_G5_15C_2011	ERR907039	2085665	29	71919.5	303303	163080	5	25	25	15C	15	NF	NVT	NVT		2011.8	2011	E3	E3B	4y	Pd
ERR907040_G5_7C_2011	ERR907040	2103073	29	72519.8	426578	184960	4	04	04A	7C	7	3162	NVT	NVT		2011.9	2011	E3	E3B	<6m	Pd
ERR907041_G5_7C_2011	ERR907041	2105098	36	58474.9	334651	176810	5	04	04A	7C	7	3162	NVT	NVT		2011.9	2011	E3	E3B	2y	Pd
ERR907042_G5_11D_2012	ERR907042	1997807	32	62431.5	269427	105854	5	03	03A	11D	11	62	NVT	NVT		2012	2012	E3	E3B	4y	Pd
ERR907043_G5_15C_2012	ERR907043	2081629	27	77097.4	215989	140245	6	25	25	15C	15	3065	NVT	NVT		2012.2	2012	E3	E3B	4y	Pd
ERR907044_G5_6A_2012	ERR907044	2113761	40	52844	264896	120566	6	21	21	6C	6	4509	NVT	NVT		2012.2	2012	E3	E3B	5y	Pd
ERR907045_G1_9A_1998	ERR907045	2139852	48	44580.2	309517	210698	4	23	23	9V	9	156	PCV7	VT	Spain9V-3	1998.2	1998	E1	E1A	3y	Pd
ERR907046_G1_9A_1998	ERR907046	2141679	42	50992.4	159216	88215	9	23	23	9V	9	3057	PCV7	VT		1998.2	1998	E1	E1A	6-<12m	Pd
ERR907047_G1_9A_1998	ERR907047	2141434	38	56353.5	167146	118815	8	23	23	9V	9	3057	PCV7	VT		1998.2	1998	E1	E1A	4y	Pd
ERR907048_G1_22F_1998	ERR907048	2133004	42	50785.8	330673	89182	7	20	20	22F	22	1294	NVT	NVT		1998.2	1998	E1	E1A	4y	Pd
ERR907049_G1_31_1998	ERR907049	2003115	38	52713.6	274380	84101	7	27	27	31	31	3027	NVT	NVT		1998.2	1998	E1	E1A	3y	Pd
ERR907050_G1_9A_1998	ERR907050	2144165	41	52296.7	251310	122419	6	23	23	9V	9	1269	PCV7	VT		1998.2	1998	E1	E1A	6-<12m	Pd
ERR907051_G1_9A_1998	ERR907051	2144130	42	51050.7	245371	122434	6	23	23	9V	9	1269	PCV7	VT		1998.2	1998	E1	E1A	2y	Pd
ERR907052_G1_NT_1998	ERR907052	2147062	49	43817.6	185677	89595	9	01	01	NT	NT	3064	NVT	NVT		1998.2	1998	E1	E1A	4y	Pd
ERR907053_G1_23F_1998	ERR907053	2082982	20	104149	727552	345465	2	09	09	23F	23	37	PCV7	VT	Tennessee23F-4	1998.3	1998	E1	E1A	4y	Pd
ERR907054_G1_13_1998	ERR907054	2149430	30	71647.7	189775	94844	9	06	06B	13	13	574	NVT	NVT		1998.3	1998	E1	E1A	6-<12m	Pd
ERR907055_G1_23B_1998	ERR907055	2137687	41	52138.7	230999	126867	7	09	09	23B	23	1448	NVT	NVT		1998.3	1998	E1	E1A	3y	Pd
ERR907056_G1_19F_1998	ERR907056	2131841	65	32797.6	184579	95544	8	04	04C	19F	19	251	PCV7	VT		1998.3	1998	E1	E1A	5y	Pd
ERR907057_G1_35F_1998	ERR907057	2060943	25	82437.7	585059	146330	4	06	06A	35F	35	487	NVT	NVT		1998.3	1998	E1	E1A	12-<24m	Pd
ERR907058_G1_23F_1998	ERR907058	2082335	21	99158.8	343744	317258	4	09	09	23F	23	33	PCV7	VT		1998.4	1998	E1	E1A	3y	Pd
ERR907059_G1_6A_1998	ERR907059	2067162	45	45936.9	259501	85478	8	17	17	6A	6	395	PCV13	VT		1998.5	1998	E1	E1A	3y	Pd
ERR907060_G1_35B_1998	ERR907060	2139178	47	45514.4	231128	97657	8	08	08	35B	35	452	NVT	NVT		1998.5	1998	E1	E1A	12-<24m	Pd
ERR907061_G1_6A_1998	ERR907061	2055628	39	52708.4	273178	96100	7	22	22	6E	6	146	NVT	VT		1998.5	1998	E1	E1A	6-<12m	Pd
ERR907062_G1_35F_1998	ERR907062	2058741	34	60551.2	274266	133919	6	06	06A	35F	35	487	NVT	NVT		1998.5	1998	E1	E1A	3y	Pd
ERR907063_G1_18B_1998	ERR907063	2072166	37	56004.5	296038	100256	7	27	27	18B	18	113	NVT	NVT	Netherlands18C-36	1998.6	1998	E1	E1A	4y	Pd
ERR907064_G1_19F_1998	ERR907064	2091298	37	56521.6	241307	99483	7	04	04C	19F	19	1340	PCV7	VT		1998.6	1998	E1	E1A	5y	Pd
ERR907065_G1_6B_1998	ERR907065	2056956	29	70929.5	284685	122052	5	18	18	6C	6	1390	NVT	NVT		1998.6	1998	E1	E1A	2y	Pd
ERR907066_G1_18B_1998	ERR907066	2133998	51	41843.1	296712	100173	7	27	27	18B	18	113	NVT	NVT	Netherlands18C-36	1998.6	1998	E1	E1A	12-<24m	Pd
ERR907067_G1_10A_1998	ERR907067	2093442	50	41868.8	215938	68508	10	02	02B	10A	10	NF*	NVT	NVT		1998.6	1998	E1	E1A	12-<24m	Pd
ERR907068_G1_19F_1998	ERR907068	2116003	80	26450	131530	50692	13	04	04C	19F	19	251	PCV7	VT		1998.7	1998	E1	E1A	3y	Pd
ERR907069_G1_6A_1998	ERR907069	2056941	41	50169.3	183912	90775	8	22	22	6E	6	146	NVT	VT		1998.7	1998	E1	E1A	6-<12m	Pd
ERR907070_G1_6A_1998	ERR907070	2092401	30	69746.7	219922	97331	8	22	22	6E	6	146	NVT	VT		1998.7	1998	E1	E1A	6-<12m	Pd
ERR907071_G1_9I_1998	ERR907071	2072368	44	47099.3	334558	82221	7	27	27	9L	9	3061	NVT	NVT		1998.7	1998	E1	E1A	5y	Pd
ERR907072_G1_23F_1998	ERR907072	2081904	20	104095	612175	300609	3	09	09	23F	23	37	PCV7	VT	Tennessee23F-4	1998.7	1998	E1	E1A	3y	Pd
ERR907073_G1_10A_1998	ERR907073	2058453	37	55633.9	242457	95944	8	02	02B	10A	10	1263	NVT	NVT		1998.7	1998	E1	E1A	6-<12m	Pd
ERR907074_G1_10A_1998	ERR907074	2059383	43	47892.6	242887	91501	8	02	02B	10A	10	1263	NVT	NVT		1998.7	1998	E1	E1A	5y	Pd
ERR907075_G1_6B_1998	ERR907075	2059451	20	102973	528624	208362	3	18	18	6C	6	1379	NVT	NVT		1998.7	1998	E1	E1A	6-<12m	Pd
ERR907076_G1_6A_1998	ERR907076	2076666	37	56126.1	289938	98414	6	21	21	6A	6	690	PCV13	VT		1998.7	1998	E1	E1A	4y	Pd
ERR907077_G1_19A_1998	ERR907077	2104601	38	55384.2	253582	122600	7	04	04B	19F	19	3040	PCV13	NVT		1998.7	1998	E1	E1A	4y	Pd
ERR907078_G1_35B_1998	ERR907078	2095002	58	36120.7	181659	64385	11	08	08	35B	35	3055	NVT	NVT		1998.7	1998	E1	E1A	4y	Pd
ERR907079_G1_14_1998	ERR907079	2121173	72	29460.7	151987	65970	12	12	12	14	14	656	PCV7	VT		1998.2	1998	E1	E1A	6-<12m	Pd
ERR907080_G1_15C_1998	ERR907080	2106277	32	65821.2	498452	125871	5	26	26A	15C	15	199	NVT	NVT	Netherlands15B-37	1998.2	1998	E1	E1A	5y	Pd
ERR907081_G1_14_1998	ERR907081	2137216	58	36848.6	161335	71560	10	12	12	14	14	3049	PCV7	VT		1998.2	1998	E1	E1A	3y	Pd
ERR907082_G1_6A_1998	ERR907082	2133098	37	57651.3	337150	126786	6	17	17	6A	6	327	PCV13	VT	Portugal6A-41	1998.2	1998	E1	E1A	6-<12m	Pd
ERR907083_G1_4_1998	ERR907083	2141817	57	37575.7	218499	87314	8	27	27	4	4	247	PCV7	VT		1998.3	1998	E1	E1A	6-<12m	Pd
ERR907084_G1_6A_1998	ERR907084	2095869	31	67608.7	262143	108140	7	22	22	6E	6	1060	NVT	VT		1998.3	1998	E1	E1A	3y	Pd
ERR907085_G1_35F_1998	ERR907085	2093425	36	58150.7	270244	123473	6	16	16A	35F	35	498	NVT	NVT		1998.3	1998	E1	E1A	12-<24m	Pd
ERR907086_G1_6A_1998	ERR907086	2133400	32	66668.8	384448	93726	6	17	17	6A	6	327	PCV13	VT	Portugal6A-41	1998.3	1998	E1	E1A	3y	Pd
ERR907087_G1_31_1998	ERR907087	2000162	31	64521.3	285831	128165	6	05	05	31	31	NF	NVT	NVT		1998.4	1998	E1	E1A	6-<12m	Pd
ERR907088_G1_19F_1998	ERR907088	2112892	47	44955.2	281624	88314	7	27	27	19F	19	177	PCV7	VT	Portugal19F-21	1998.4	1998	E1	E1A	3y	Pd
ERR907089_G1_10A_1998	ERR907089	2098133	31	67681.7	475891	104374	6	16	16B	10A	10	816	NVT	NVT		1998.4	1998	E1	E1A	6-<12m	Pd
ERR907090_G1_9I_1998	ERR907090	2138880	45	47530.7	278089	136594	5	27	27	9L	9	3061	NVT	NVT		1998.4	1998	E1	E1A	2y	Pd
ERR907091_G1_NT_1998	ERR907091	2143395	53	40441.4	189628	97469	9	01	01	NT	NT	448	NVT	NVT	USANT-43	1998.5	1998	E1	E1A	6-<12m	Pd
ERR907092_G1_23B_1998	ERR907092	2126695	36	59074.9	377121	125093	5	09	09	23B	23	439	NVT	NVT		1998.5	1998	E1	E1A	6-<12m	Pd
ERR907093_G1_14_1998	ERR907093	2181944	59	36982.1	187259	71465	9	12	12	14	14	3049	PCV7	VT		1998.5	1998	E1	E1A	3y	Pd
ERR907094_G1_17F_1998	ERR907094	2116194	26	81392.1	312893	134293	6	06	06B	17F	17	3075	NVT	NVT		1998.6	1998	E1	E1A	3y	Pd
ERR907095_G1_13_1998	ERR907095	2148287	50	42965.7	245012	115101	7	06	06B	13	13	574	NVT	NVT		1998.6	1998	E1	E1A	6-<12m	Pd
ERR907096_G1_9I_1998	ERR907096	2137777	45	47506.2	279813	128836	7	27	27	9L	9	3061	NVT	NVT		1998.6	1998	E1	E1A	3y	Pd
ERR907097_G1_6A_1998	ERR907097	2133724	30	71124.1	406227	150759	5	17	17	6A	6	327	PCV13	VT	Portugal6A-41	1998.7	1998	E1	E1A	6-<12m	Pd
ERR907098_G1_6B_1998	ERR907098	2109903	43	49067.5	487496	148952	4	18	18	6C	6	NF*	NVT	NVT		1998.8	1998	E1	E1A	6-<12m	Pd
ERR907099_G1_35F_1998	ERR907099	2160463	36	60012.9	416015	103955	6	16	16A	35F	35	498	NVT	NVT		1998.8	1998	E1	E1A	3y	Pd
ERR907100_G1_12A_1998	ERR907100	2004657	27	74246.6	400694	196567	4	27	27	12A	12	218	NVT	NVT	Denmark12F-24	1998.7	1998	E1	E1A	6-<12m	Pd
ERR907101_G1_19A_1998	ERR907101	2111236	40	52780.9	256646	128601	6	26	26B	19A	19	199	PCV13	NVT		1998.9	1998	E1	E1A	4y	Pd
ERR907102_G1_19A_1998	ERR907102	2150853	45	47796.7	255313	128633	6	26	26B	19A	19	199	PCV13	NVT		1999	1998	E1	E1A	6-<12m	Pd
ERR907103_G1_15C_1998	ERR907103	2124264	29	73250.5	447825	228300	3	26	26A	15C	15	1757	NVT	NVT		1999	1998	E1	E1A	2y	Pd
ERR907104_G1_4_1999	ERR907104	2115656	52	40685.7	195102	74594	10	27	27	4	4	205	PCV7	VT	Sweden4-38	1999	1999	E1	E1B	6-<12m	Pd
ERR907105_G1_5_1999	ERR907105	2099161	41	51199.1	252996	109173	7	04	04A	5	5	3040	PCV13	NVT		1999	1999	E1	E1B	3y	Pd
ERR907106_G1_15A_1999	ERR907106	1996181	29	68833.8	412203	171587	4	19	19A	15A	15	3058	NVT	NVT		1999	1999	E1	E1B	2y	Pd
ERR907107_G1_19A_1999	ERR907107	2099455	44	47714.9	287497	85505	9	04	04B	19F	19	3040	PCV13	NVT		1999	1999	E1	E1B	6-<12m	Pd
ERR907108_G1_19A_1999	ERR907108	2097471	46	45597.2	196442	89587	9	04	04B	19F	19	3040	PCV13	NVT		1999	1999	E1	E1B	6-<12m	Pd
ERR907109_G1_31_1999	ERR907109	2002059	28	71502.1	266086	129210	6	05	05	31	31	NF	NVT	NVT		1999.1	1999	E1	E1B	4y	Pd
ERR907110_G1_22F_1999	ERR907110	2132668	26	82025.7	518019	260215	3	20	20	22F	22	1294	NVT	NVT		1999.1	1999	E1	E1B	4y	Pd
ERR907111_G1_9A_1999	ERR907111	2144485	48	44676.8	245279	78872	7	23	23	9V	9	1269	PCV7	VT		1999.1	1999	E1	E1B	3y	Pd
ERR907112_G1_1_1999	ERR907112	2093238	55	38058.9	149292	75223	9	27	27	1	1	227	PCV13	NVT		1999.1	1999	E1	E1B	5y	Pd
ERR907113_G1_19A_1999	ERR907113	2100913	50	42018.3	253206	122596	7	04	04B	19F	19	3040	PCV13	NVT		1999.1	1999	E1	E1B	2y	Pd
ERR907114_G1_31_1999	ERR907114	2039999	48	42500	246268	81050	7	05	05	31	31	1111	NVT	NVT		1999.1	1999	E1	E1B	5y	Pd
ERR907115_G1_17F_1999	ERR907115	2057689	47	43780.6	206517	82517	8	06	06B	17F	17	392	NVT	NVT		1999.1	1999	E1	E1B	4y	Pd
ERR907116_G1_35F_1999	ERR907116	2059688	30	68656.3	466210	148810	4	06	06A	35F	35	487	NVT	NVT		1999.1	1999	E1	E1B	5y	Pd
ERR907117_G1_31_1999	ERR907117	2039228	46	44331	246581	95577	7	05	05	31	31	1111	NVT	NVT		1999.1	1999	E1	E1B	3y	Pd
ERR907118_G5_7C_2011	ERR907118	2141221	48	44608.8	194093	109527	8	04	04A	7C	7	NF	NVT	NVT		2011.7	2011	E3	E3B	2y	Pd
ERR907119_G5_6A_2011	ERR907119	2138140	33	64792.1	275861	118496	6	22	22	6C	6	NF	NVT	NVT		2011.7	2011	E3	E3B	12-<24m	Pd
ERR907120_G5_35B_2011	ERR907120	2127057	40	53176.4	201952	75219	9	08	08	35B	35	452	NVT	NVT		2011.7	2011	E3	E3B	<6m	Pd
ERR907121_G5_23B_2011	ERR907121	2126651	32	66457.8	362472	230241	4	09	09	23B	23	439	NVT	NVT		2011.8	2011	E3	E3B	5y	Pd
ERR907122_G5_22A_2011	ERR907122	2059162	42	49027.7	283674	98246	7	13	13	22A	22	433	NVT	NVT		2011.8	2011	E3	E3B	2y	Pd
ERR907123_G5_16F_2011	ERR907123	2103696	35	60105.6	186684	118244	8	14	14	16F	16	1840	NVT	NVT		2011.9	2011	E3	E3B	3y	Pd
ERR907124_G5_22A_2011	ERR907124	2095572	25	83822.9	526582	171471	4	13	13	22A	22	433	NVT	NVT		2011.9	2011	E3	E3B	2y	Pd
ERR907125_G5_15C_2011	ERR907125	2123150	44	48253.4	224087	117398	7	23	23	15C	15	162	NVT	NVT		2011.9	2011	E3	E3B	4y	Pd
ERR907126_G5_34_2011	ERR907126	2079305	17	122312	548552	273105	3	20	20	34	34	547	NVT	NVT		2011.9	2011	E3	E3B	<6m	Pd
ERR907127_G5_22A_2011	ERR907127	2054463	29	70843.6	299147	118986	6	13	13	22A	22	5857	NVT	NVT		2011.9	2011	E3	E3B	2y	Pd
ERR907128_G5_6A_2012	ERR907128	2170184	37	58653.6	260015	139454	6	21	21	6C	6	473	NVT	NVT		2012	2012	E3	E3B	2y	Pd
ERR907129_G5_6A_2012	ERR907129	2054728	38	54071.8	248727	115519	7	22	22	6C	6	146	NVT	NVT		2012.1	2012	E3	E3B	3y	Pd
ERR907130_G5_19F_2012	ERR907130	2097260	49	42801.2	261440	77400	8	04	04C	19F	19	654	PCV7	VT		2012.1	2012	E3	E3B	3y	Pd
ERR907131_G5_21_2012	ERR907131	2091467	44	47533.3	177621	91723	8	25	25	21	21	3689	NVT	NVT		2012.2	2012	E3	E3B	<6m	Pd
ERR907132_G5_6B_2012	ERR907132	2058951	30	68631.7	428485	179460	4	18	18	6C	6	1390	NVT	NVT		2012.2	2012	E3	E3B	4y	Pd
ERR907133_G5_11D_2010	ERR907133	2011399	49	41049	278763	78091	8	03	03A	11D	11	62	NVT	NVT		2010.3	2010	E3	E3A	6-<12m	Pd
ERR907134_G5_3_2010	ERR907134	1986889	19	104573	314043	191529	4	02	02A	3	3	1119	PCV13	NVT		2010.3	2010	E3	E3A	12-<24m	Pd
ERR907135_G5_11D_2010	ERR907135	2002900	28	71532.1	437377	96208	6	03	03A	11D	11	62	NVT	NVT		2010.3	2010	E3	E3A	6-<12m	Pd
ERR907136_G5_11D_2010	ERR907136	2003214	29	69076.3	342447	124241	5	03	03A	11D	11	62	NVT	NVT		2010.3	2010	E3	E3A	4y	Pd
ERR907137_G5_15C_2010	ERR907137	2121333	36	58925.9	224337	91263	7	23	23	15C	15	162	NVT	NVT		2010.3	2010	E3	E3A	12-<24m	Pd
ERR907138_G5_22A_2010	ERR907138	2130595	42	50728.4	260872	77672	8	13	13	22A	22	433	NVT	NVT		2010.3	2010	E3	E3A	2y	Pd
ERR907139_G5_19A_2010	ERR907139	2142304	39	54930.9	248814	125990	6	26	26B	19A	19	199	PCV13	NVT		2010.3	2010	E3	E3A	6-<12m	Pd
ERR907140_G5_19A_2010	ERR907140	2141247	39	54903.8	249948	125078	6	26	26B	19A	19	199	PCV13	NVT		2010.3	2010	E3	E3A	4y	Pd
ERR907141_G5_23B_2010	ERR907141	2123201	24	88466.7	586541	190126	3	09	09	23B	23	439	NVT	NVT		2010.3	2010	E3	E3A	4y	Pd
ERR907142_G5_23B_2010	ERR907142	2136179	39	54773.8	415982	190126	4	09	09	23B	23	439	NVT	NVT		2010.3	2010	E3	E3A	3y	Pd
ERR907143_G5_NT_2010	ERR907143	2155405	64	33678.2	156200	71148	10	01	01	NT	NT	344	NVT	NVT	NorwayNT-42	2010.4	2010	E3	E3A	3y	Pd
ERR907144_G5_6A_2010	ERR907144	2053612	44	46673	168147	92496	9	22	22	6C	6	146	NVT	NVT		2010.4	2010	E3	E3A	12-<24m	Pd
ERR907145_G5_15C_2010	ERR907145	2108270	32	65883.4	365659	129114	5	26	26A	15C	15	199	NVT	NVT	Netherlands15B-37	2010.4	2010	E3	E3A	<6m	Pd
ERR907146_G5_23A_2010	ERR907146	2085507	25	83420.3	339083	156230	5	24	24	23A	23	7480	NVT	NVT		2010.5	2010	E3	E3A	12-<24m	Pd
ERR907147_G5_22A_2010	ERR907147	2099304	43	48821	257272	77660	7	13	13	22A	22	433	NVT	NVT		2010.5	2010	E3	E3A	2y	Pd
ERR907148_G5_NT_2010	ERR907148	2142130	46	46568	312034	87542	7	01	01	NT	NT	1186	NVT	NVT		2010.6	2010	E3	E3A	3y	Pd
ERR907149_G5_19A_2010	ERR907149	2076565	40	51914.1	219167	120871	7	26	26B	19A	19	2344	PCV13	NVT		2010.6	2010	E3	E3A	3y	Pd
ERR907150_G5_21_2010	ERR907150	2114281	42	50340	176417	99730	9	25	25	21	21	193	NVT	NVT	Greece21-30	2010.6	2010	E3	E3A	12-<24m	Pd
ERR907151_G5_11A_2010	ERR907151	2077999	34	61117.6	284964	82128	7	27	27	11A	11	45	NVT	NVT		2010.6	2010	E3	E3A	3y	Pd
ERR907152_G5_19A_2010	ERR907152	2045848	38	53838.1	580688	95205	4	10	10	19A	19	NF	PCV13	NVT		2010.6	2010	E3	E3A	<6m	Pd
ERR907153_G5_34_2010	ERR907153	2080521	16	130033	735341	552115	2	20	20	34	34	547	NVT	NVT		2010.7	2010	E3	E3A	3y	Pd
ERR907154_G5_23B_2010	ERR907154	2124462	25	84978.5	626953	222090	3	09	09	23B	23	1847	NVT	NVT		2010.8	2010	E3	E3A	2y	Pd
ERR907155_G5_21_2010	ERR907155	2156334	56	38506	239554	92639	8	25	25	21	21	NF	NVT	NVT		2010.9	2010	E3	E3A	3y	Pd
ERR907156_G5_23A_2010	ERR907156	2099584	24	87482.7	291520	175347	5	24	24	23A	23	338	NVT	NVT	Colombia23F-26	2010.9	2010	E3	E3A	4y	Pd
ERR907157_G5_23A_2010	ERR907157	2090602	26	80407.8	225758	122964	6	24	24	23A	23	338	NVT	NVT	Colombia23F-26	2010.9	2010	E3	E3A	3y	Pd
ERR907158_G5_15C_2011	ERR907158	2057629	29	70952.7	265544	141535	5	26	26A	15C	15	199	NVT	NVT	Netherlands15B-37	2011	2011	E3	E3B	4y	Pd
ERR907159_G5_15A_2011	ERR907159	2068559	30	68952	414004	184010	4	19	19A	15A	15	3058	NVT	NVT		2011	2011	E3	E3B	12-<24m	Pd
ERR907160_G5_7C_2011	ERR907160	2108460	37	56985.4	171317	103873	8	04	04A	7C	7	1797	NVT	NVT		2011.2	2011	E3	E3B	5y	Pd
ERR907161_G5_23B_2011	ERR907161	2082227	21	99153.7	775608	230275	3	09	09	23B	23	1448	NVT	NVT		2011.2	2011	E3	E3B	5y	Pd
ERR907162_G5_7C_2011	ERR907162	2148922	49	43855.6	202378	85230	8	04	04A	7C	7	1797	NVT	NVT		2011.3	2011	E3	E3B	4y	Pd
ERR907163_G5_7F_2011	ERR907163	1977499	31	63790.3	270077	116235	5	27	27	7F	7	3544	PCV13	NVT		2011.3	2011	E3	E3B	6-<12m	Pd
ERR907164_G5_7F_2011	ERR907164	1977653	29	68194.9	270075	175223	5	27	27	7F	7	3544	PCV13	NVT		2011.3	2011	E3	E3B	5y	Pd
ERR907165_G5_15C_2011	ERR907165	2121410	40	53035.2	212553	104463	7	23	23	15C	15	162	NVT	NVT		2011.3	2011	E3	E3B	2y	Pd
ERR907166_G5_15C_2011	ERR907166	2121469	44	48215.2	205120	89341	9	23	23	15C	15	162	NVT	NVT		2011.5	2011	E3	E3B	<6m	Pd
ERR907167_G5_16F_2011	ERR907167	2100254	33	63644.1	356816	150873	5	14	14	16F	16	1840	NVT	NVT		2011.5	2011	E3	E3B	5y	Pd
ERR907168_G5_15C_2011	ERR907168	2089906	33	63330.5	276811	125875	5	26	26A	15C	15	199	NVT	NVT	Netherlands15B-37	2011.6	2011	E3	E3B	2y	Pd
ERR907169_G5_35B_2011	ERR907169	2087068	41	50904.1	516741	130892	4	23	23	35B	15	162	NVT	NVT		2011.6	2011	E3	E3B	12-<24m	Pd
ERR907170_G5_23A_2011	ERR907170	2111683	32	65990.1	337714	157261	5	24	24	23A	23	338	NVT	NVT	Colombia23F-26	2011.6	2011	E3	E3B	4y	Pd
ERR907171_G5_15C_2011	ERR907171	2085591	34	61340.9	237921	126032	6	25	25	15C	15	3065	NVT	NVT		2011.7	2011	E3	E3B	12-<24m	Pd
ERR907172_G5_34_2011	ERR907172	2085004	18	115834	552629	265004	3	20	20	34	34	547	NVT	NVT		2011.7	2011	E3	E3B	3y	Pd
ERR907173_G5_6A_2011	ERR907173	2132165	37	57626.1	213533	92995	8	21	21	6C	6	473	NVT	NVT		2011.7	2011	E3	E3B	5y	Pd
ERR907174_G5_37_2011	ERR907174	2045096	20	102255	379877	257219	4	03	03B	37	37	100	NVT	NVT		2011.7	2011	E3	E3B	12-<24m	Pd
ERR907175_G5_35B_2011	ERR907175	2104062	43	48931.7	251430	104769	7	08	08	35B	35	452	NVT	NVT		2011.9	2011	E3	E3B	2y	Pd
ERR907176_G5_NT_2011	ERR907176	2093711	63	33233.5	140413	60485	12	01	01	NT	NT	1054	NVT	NVT		2012	2011	E3	E3B	4y	Pd
ERR907177_G5_NT_2011	ERR907177	2094197	67	31256.7	178434	60244	13	01	01	NT	NT	1054	NVT	NVT		2012	2011	E3	E3B	5y	Pd
ERR907178_G5_19A_2012	ERR907178	2047758	37	55344.8	378213	210709	4	10	10	19A	19	320*	PCV13	NVT		2012	2012	E3	E3B	2y	Pd
ERR907179_G5_15A_2012	ERR907179	1998296	25	79931.8	412918	168590	5	19	19A	15A	15	3058	NVT	NVT		2012	2012	E3	E3B	4y	Pd
ERR907181_G5_22A_2012	ERR907181	2062791	20	103140	366165	204542	4	13	13	22A	22	433	NVT	NVT		2012.1	2012	E3	E3B	5y	Pd
ERR907182_G5_7C_2012	ERR907182	2062866	31	66544.1	396228	152375	4	04	04A	7C	7	3162	NVT	NVT		2012.1	2012	E3	E3B	4y	Pd
ERR907183_G5_35B_2012	ERR907183	2035685	25	81427.4	448247	167312	4	11	11	35B	35	NF	NVT	NVT		2012.1	2012	E3	E3B	4y	Pd
ERR907184_G5_9I_2012	ERR907184	2048266	30	68275.5	443679	137930	5	27	27	9L	9	66	NVT	NVT		2012.2	2012	E3	E3B	2y	Pd
ERR907185_G5_31_2012	ERR907185	2037838	42	48519.9	190349	81149	8	05	05	31	31	1111	NVT	NVT		2012.2	2012	E3	E3B	4y	Pd
ERR907186_G5_34_2012	ERR907186	2105439	15	140363	559268	345128	3	20	20	34	34	547	NVT	NVT		2012.2	2012	E3	E3B	4y	Pd
ERR907187_G5_23A_2010	ERR907187	2090131	39	53593.1	304540	125999	6	24	24	23A	23	338	NVT	NVT	Colombia23F-26	2010.4	2010	E3	E3A	<6m	Pd
ERR907188_G5_11D_2010	ERR907188	2033135	31	65585	278772	172422	5	03	03A	11D	11	62	NVT	NVT		2010.4	2010	E3	E3A	2y	Pd
ERR907189_G5_19A_2010	ERR907189	2045842	37	55293	610039	95208	4	10	10	19A	19	320*	PCV13	NVT		2010.7	2010	E3	E3A	3y	Pd
ERR907190_G5_15C_2010	ERR907190	2086371	29	71943.8	370351	153130	5	25	25	15C	15	3065	NVT	NVT		2010.8	2010	E3	E3A	<6m	Pd
ERR907191_G5_34_2010	ERR907191	2140841	40	53521	338657	214824	5	20	20	34	34	547	NVT	NVT		2010.8	2010	E3	E3A	2y	Pd
ERR907192_G5_34_2010	ERR907192	2146018	39	55026.1	345282	204829	5	20	20	34	34	547	NVT	NVT		2010.8	2010	E3	E3A	4y	Pd
ERR907193_G5_15C_2010	ERR907193	2083247	29	71836.1	276569	163104	5	25	25	15C	15	3065	NVT	NVT		2010.8	2010	E3	E3A	<6m	Pd
ERR907194_G5_34_2010	ERR907194	2095513	28	74839.8	330374	153051	5	20	20	34	34	547	NVT	NVT		2010.9	2010	E3	E3A	5y	Pd
ERR907195_G5_6A_2010	ERR907195	2115956	40	52898.9	264649	106067	6	21	21	6C	6	4509*	NVT	NVT		2010.9	2010	E3	E3A	4y	Pd
ERR907196_G5_16F_2010	ERR907196	2111104	27	78189	414795	182684	4	14	14	16F	16	1840	NVT	NVT		2010.9	2010	E3	E3A	3y	Pd
ERR907197_G5_17F_2011	ERR907197	2048239	24	85343.3	359097	171186	4	19	19B	17F	17	1794	NVT	NVT		2011	2011	E3	E3B	3y	Pd
ERR907198_G5_15C_2011	ERR907198	2082297	31	67170.9	307268	163082	5	25	25	15C	15	3065	NVT	NVT		2011.2	2011	E3	E3B	3y	Pd
ERR907199_G5_5_2011	ERR907199	2108823	45	46862.7	241102	93827	8	04	04A	5	5	2011	PCV13	NVT		2011.3	2011	E3	E3B	2y	Pd
ERR907200_G5_15C_2011	ERR907200	2057989	39	52768.9	480831	130254	5	27	27	15C	15	NF	NVT	NVT		2011.3	2011	E3	E3B	<6m	Pd
ERR907201_G5_5_2011	ERR907201	2140833	43	49786.8	270698	121727	6	04	04A	5	5	2011	PCV13	NVT		2011.3	2011	E3	E3B	<6m	Pd
ERR907202_G5_23A_2011	ERR907202	2122461	36	58957.2	349989	128334	6	24	24	23A	23	338	NVT	NVT	Colombia23F-26	2011.4	2011	E3	E3B	4y	Pd
ERR907203_G5_23B_2011	ERR907203	2127633	36	59100.9	254478	143724	6	09	09	23B	23	439	NVT	NVT		2011.4	2011	E3	E3B	3y	Pd
ERR907204_G1_31_1999	ERR907204	2002993	29	69068.7	247732	185677	5	05	05	31	31	NF	NVT	NVT		1999.1	1999	E1	E1B	4y	Pd
ERR907205_G1_25F_1999	ERR907205	2071997	40	51799.9	239526	98876	6	04	04C	19F	19	2011	PCV7	VT		1999.1	1999	E1	E1B	5y	Pd
ERR907206_G1_15C_1999	ERR907206	2057811	41	50190.5	266666	112958	7	26	26A	15C	15	199	NVT	NVT	Netherlands15B-37	1999.1	1999	E1	E1B	4y	Pd
ERR907207_G1_23F_1999	ERR907207	2073470	23	90150.9	570772	150731	3	09	09	23F	23	833	PCV7	VT		1999.1	1999	E1	E1B	4y	Pd
ERR907208_G1_33F_1999	ERR907208	1993641	29	68746.2	227196	121906	6	03	03A	33F	35	1012	NVT	NVT		1999.1	1999	E1	E1B	2y	Pd
ERR907209_G1_6A_1999	ERR907209	2056392	35	58754.1	210723	105082	7	22	22	6E	6	146	NVT	VT		1999.1	1999	E1	E1B	4y	Pd
ERR907210_G1_6A_1999	ERR907210	2067276	43	48076.2	259068	84525	8	17	17	6A	6	395	PCV13	VT		1999.1	1999	E1	E1B	2y	Pd
ERR907211_G1_6A_1999	ERR907211	2065323	46	44898.3	258819	85920	8	17	17	6A	6	395	PCV13	VT		1999.1	1999	E1	E1B	3y	Pd
ERR907212_G1_1_1999	ERR907212	2093519	46	45511.3	264452	97542	7	27	27	1	1	227	PCV13	NVT		1999.2	1999	E1	E1B	4y	Pd
ERR907213_G1_6A_1999	ERR907213	2111854	21	100564	386595	205000	4	27	27	6A	6	1092	PCV13	VT		1999.2	1999	E1	E1B	6-<12m	Pd
ERR907214_G1_22F_1999	ERR907214	2133205	32	66662.7	295650	148030	5	20	20	22F	22	1294	NVT	NVT		1999.2	1999	E1	E1B	2y	Pd
ERR907215_G1_6B_1999	ERR907215	2075960	39	53229.7	273979	92662	7	21	21	6A	6	690	PCV13	VT		1999.2	1999	E1	E1B	3y	Pd
ERR907216_G1_6B_1999	ERR907216	2074915	34	61026.9	348032	100005	6	21	21	6A	6	690	PCV13	VT		1999.2	1999	E1	E1B	5y	Pd
ERR907217_G1_35B_1999	ERR907217	2101702	44	47765.9	172673	103784	9	08	08	35B	35	452	NVT	NVT		1999.2	1999	E1	E1B	3y	Pd
ERR907218_G1_9A_1999	ERR907218	2177669	52	41878.2	245270	68827	8	23	23	9V	9	1269	PCV7	VT		1999.2	1999	E1	E1B	12-<24m	Pd
ERR907219_G1_33A_1998	ERR907219	2010298	48	41881.2	220921	79785	8	27	27	33A	33	447*	NVT	VT		1998.7	1998	E1	E1A	3y	Pd
ERR907220_G1_35F_1998	ERR907220	2056909	37	55592.1	393877	148766	4	06	06A	35F	35	487	NVT	NVT		1998.8	1998	E1	E1A	2y	Pd
ERR907221_G1_NT_1998	ERR907221	2064166	77	26807.3	116568	55810	14	01	01	NT	NT	1054	NVT	NVT		1998.8	1998	E1	E1A	4y	Pd
ERR907222_G1_19A_1998	ERR907222	2112231	40	52805.8	516467	150080	4	26	26B	19A	19	199	PCV13	NVT		1998.8	1998	E1	E1A	12-<24m	Pd
ERR907223_G1_9A_1998	ERR907223	2166208	50	43324.2	240787	106681	7	23	23	9V	9	NF	PCV7	VT		1998.8	1998	E1	E1A	6-<12m	Pd
ERR907224_G1_6B_1998	ERR907224	2073939	42	49379.5	255448	99752	7	21	21	6A	6	690	PCV13	VT		1998.8	1998	E1	E1A	5y	Pd
ERR907225_G1_6A_1998	ERR907225	2098138	39	53798.4	260545	121104	6	22	22	6E	6	1060	NVT	VT		1998.8	1998	E1	E1A	3y	Pd
ERR907226_G1_6B_1998	ERR907226	2073909	35	59254.5	328783	85565	8	27	27	6B	6	3028	PCV7	VT		1998.8	1998	E1	E1A	2y	Pd
ERR907227_G1_15A_1998	ERR907227	2036908	27	75441	452680	169780	4	19	19A	15A	15	3058	NVT	NVT		1998.8	1998	E1	E1A	12-<24m	Pd
ERR907228_G1_11D_1998	ERR907228	2013589	34	59223.2	318071	124595	5	03	03A	11D	11	62	NVT	NVT		1998.9	1998	E1	E1A	12-<24m	Pd
ERR907229_G1_11D_1998	ERR907229	2009585	29	69296	282565	159980	5	03	03A	11D	11	62	NVT	NVT		1998.9	1998	E1	E1A	2y	Pd
ERR907230_G1_10A_1998	ERR907230	2062396	39	52881.9	241369	96025	8	02	02B	10A	10	1263	NVT	NVT		1998.9	1998	E1	E1A	2y	Pd
ERR907231_G1_7B_1998	ERR907231	2085038	32	65157.4	336628	180995	5	26	26A	7B	7	1757	NVT	NVT		1998.9	1998	E1	E1A	3y	Pd
ERR907232_G1_35B_1998	ERR907232	2101317	45	46695.9	176965	73723	11	08	08	35B	35	452	NVT	NVT		1998.9	1998	E1	E1A	2y	Pd
ERR907233_G1_19A_1998	ERR907233	2151367	49	43905.4	299196	130689	5	26	26B	19A	19	199	PCV13	NVT		1998.9	1998	E1	E1A	2y	Pd
ERR907234_G1_23F_1998	ERR907234	2158724	24	89946.8	490712	294548	3	09	09	23F	23	37*	PCV7	VT		1998.9	1998	E1	E1A	12-<24m	Pd
ERR907235_G1_14_1998	ERR907235	2195962	67	32775.6	162698	75172	11	12	12	14	14	124	PCV7	VT	Netherlands14-35	1999	1998	E1	E1A	12-<24m	Pd
ERR907236_G1_15C_1998	ERR907236	2053407	30	68446.9	497709	125291	5	26	26A	15C	15	199	NVT	NVT	Netherlands15B-37	1999	1998	E1	E1A	5y	Pd
ERR907237_G1_9A_1998	ERR907237	2140391	42	50961.7	159265	118842	8	23	23	9V	9	3057	PCV7	VT		1999	1998	E1	E1A	12-<24m	Pd
ERR907238_G1_15A_1998	ERR907238	2034562	25	81382.5	498776	191855	4	19	19A	15A	15	3058	NVT	NVT		1998	1998	E1	E1A	3y	Pd
ERR907239_G1_23F_1998	ERR907239	2082809	21	99181.4	638906	318226	3	09	09	23F	23	33	PCV7	VT		1998	1998	E1	E1A	3y	Pd
ERR907240_G1_35B_1998	ERR907240	2138471	50	42769.4	123821	81491	10	08	08	35B	35	452	NVT	NVT		1998.8	1998	E1	E1A	6-<12m	Pd
ERR907241_G1_10A_1998	ERR907241	2061330	53	38893	172545	82347	9	02	02B	10A	10	1263	NVT	NVT		1998.9	1998	E1	E1A	4y	Pd
ERR907242_G1_23F_1998	ERR907242	2101235	51	41200.7	274083	69503	9	27	27	23F	23	242	PCV7	VT	Taiwan23F-15	1999	1998	E1	E1A	2y	Pd
ERR907243_G1_6A_1998	ERR907243	2129854	33	64541	258510	113847	6	17	17	6A	6	3047	PCV13	VT		1999	1998	E1	E1A	2y	Pd
ERR907244_G1_21_1999	ERR907244	2112638	37	57098.3	282850	129553	6	25	25	21	21	193	NVT	NVT	Greece21-30	1999	1999	E1	E1B	2y	Pd
ERR907245_G1_23F_1999	ERR907245	2091959	24	87165	421254	178050	4	09	09	23F	23	33	PCV7	VT		1999.1	1999	E1	E1B	2y	Pd
ERR907246_G1_9A_1999	ERR907246	2134158	37	57679.9	243779	122514	7	23	23	9V	9	1206	PCV7	VT		1999.2	1999	E1	E1B	2y	Pd
ERR907247_G1_14_1999	ERR907247	2069931	48	43123.6	167619	89383	9	12	12	14	14	124	PCV7	VT	Netherlands14-35	1999.2	1999	E1	E1B	12-<24m	Pd
ERR907248_G1_6A_1999	ERR907248	2082980	33	63120.6	302852	102657	6	22	22	6E	6	1060	NVT	VT		1999.2	1999	E1	E1B	6-<12m	Pd
ERR907249_G1_6B_1999	ERR907249	2105693	31	67925.6	370635	139434	5	18	18	6C	6	1379	NVT	NVT		1999.2	1999	E1	E1B	12-<24m	Pd
ERR907250_G1_9I_1999	ERR907250	2137129	52	41098.6	278344	82793	7	27	27	9L	9	3061	NVT	NVT		1999.3	1999	E1	E1B	12-<24m	Pd
ERR907251_G1_15A_1999	ERR907251	2033921	35	58112	381900	172269	4	19	19A	15A	15	3058	NVT	NVT		1999	1999	E1	E1B	5y	Pd
ERR907252_G1_23F_1999	ERR907252	2119826	26	81531.8	363659	237144	4	09	09	23F	23	37*	PCV7	VT		1999	1999	E1	E1B	3y	Pd
ERR907253_G1_11D_1999	ERR907253	2013601	35	57531.5	249164	81450	8	03	03A	11D	11	62	NVT	NVT		1999.1	1999	E1	E1B	5y	Pd
ERR907254_G1_6A_1999	ERR907254	2061474	38	54249.3	207289	100064	8	17	17	6A	6	NF*	PCV13	VT		1999.1	1999	E1	E1B	6-<12m	Pd
ERR907255_G1_19F_1999	ERR907255	2096236	49	42780.3	220943	74701	8	04	04C	19F	19	NF	PCV7	VT		1999.1	1999	E1	E1B	6-<12m	Pd
ERR907256_G1_11D_1999	ERR907256	2002989	26	77038	591055	145800	4	03	03A	11D	11	62	NVT	NVT		1999.1	1999	E1	E1B	<6m	Pd
ERR907257_G1_23F_1999	ERR907257	2062390	20	103120	583464	204536	3	09	09	23F	23	36	PCV7	VT		1999.2	1999	E1	E1B	12-<24m	Pd
ERR907258_G1_23F_1999	ERR907258	2060034	20	103002	581902	462993	2	09	09	23F	23	36	PCV7	VT		1999.2	1999	E1	E1B	4y	Pd
ERR907259_G1_11D_1999	ERR907259	2003323	27	74197.1	516793	150793	4	03	03A	11D	11	62	NVT	NVT		1999.2	1999	E1	E1B	12-<24m	Pd
ERR907260_G1_6A_1999	ERR907260	2094043	35	59829.8	428040	106730	5	21	21	6C	6	473	NVT	NVT		1999.2	1999	E1	E1B	12-<24m	Pd
ERR907261_G1_3_1999	ERR907261	2014062	19	106003	448923	248193	3	02	02A	3	3	180	PCV13	NVT	Netherlands3-31	1999.2	1999	E1	E1B	4y	Pd
ERR907262_G1_4_1999	ERR907262	2079763	54	38514.1	176296	79698	9	27	27	4	4	247	PCV7	VT		1999.2	1999	E1	E1B	4y	Pd
ERR907263_G1_35A_1999	ERR907263	2016847	24	84035.3	409026	182204	4	07	07	35A	35	4505	NVT	NVT		1999.2	1999	E1	E1B	12-<24m	Pd
ERR907264_G1_15A_1999	ERR907264	2032350	26	78167.3	415511	172798	5	19	19A	15A	15	3058	NVT	NVT		1999.2	1999	E1	E1B	6-<12m	Pd
ERR907265_G1_34_1999	ERR907265	2096470	43	48755.1	204865	141859	7	20	20	34	34	547	NVT	NVT		1999.2	1999	E1	E1B	12-<24m	Pd
ERR907266_G1_NT_1999	ERR907266	2122167	53	40040.9	340457	75114	9	27	27	NT	NT	NF	NVT	NVT		1999.2	1999	E1	E1B	2y	Pd
ERR907267_G1_23B_1999	ERR907267	2162970	34	63616.8	318996	172664	5	09	09	23B	23	439	NVT	NVT		1999.2	1999	E1	E1B	2y	Pd
ERR907268_G1_23A_1999	ERR907268	2078004	23	90348	585569	262502	3	09	09	23A	23	1448	NVT	NVT		1999.3	1999	E1	E1B	6-<12m	Pd
ERR907269_G1_9A_1999	ERR907269	2143741	40	53593.5	246035	122439	6	23	23	9V	9	1269	PCV7	VT		1999.3	1999	E1	E1B	12-<24m	Pd
ERR907270_G1_6A_1999	ERR907270	2162117	35	61774.8	322245	105812	7	27	27	6A	6	1092	PCV13	VT		1999.3	1999	E1	E1B	6-<12m	Pd
ERR907271_G1_19A_1999	ERR907271	2109040	39	54077.9	261535	125229	6	26	26B	19A	19	199	PCV13	NVT		1999.3	1999	E1	E1B	4y	Pd
ERR907272_G1_4_1999	ERR907272	2079518	54	38509.6	199593	79703	9	27	27	4	4	247	PCV7	VT		1999.4	1999	E1	E1B	6-<12m	Pd
ERR907273_G1_11D_1999	ERR907273	2013344	25	80533.8	294517	149984	5	03	03A	11D	11	62	NVT	NVT		1999.4	1999	E1	E1B	12-<24m	Pd
ERR907274_G1_37_1999	ERR907274	1988357	18	110464	407251	257659	4	03	03B	37	37	1367	NVT	NVT		1999.4	1999	E1	E1B	12-<24m	Pd
ERR907275_G1_6A_1999	ERR907275	2125132	35	60718.1	199010	107825	8	27	27	6A	6	460	PCV13	VT		1999.4	1999	E1	E1B	5y	Pd
ERR907276_G1_6B_1999	ERR907276	2056380	32	64261.9	284259	122059	6	18	18	6C	6	1390	NVT	NVT		1999.4	1999	E1	E1B	12-<24m	Pd
ERR907277_G1_6A_1999	ERR907277	2126062	44	48319.6	262005	118133	7	22	22	6E	6	146	NVT	VT		1999.4	1999	E1	E1B	3y	Pd
ERR907278_G1_19A_1999	ERR907278	2094927	37	56619.7	204935	88466	8	04	04B	19F	19	3040	PCV13	NVT		1999.5	1999	E1	E1B	5y	Pd
ERR907279_G1_35B_1999	ERR907279	2144120	46	46611.3	124584	94324	10	08	08	35B	35	452	NVT	NVT		1999.5	1999	E1	E1B	12-<24m	Pd
ERR907280_G1_23A_1999	ERR907280	2065905	20	103295	582002	332413	3	09	09	23A	23	1448	NVT	NVT		1999.6	1999	E1	E1B	4y	Pd
ERR907281_G1_23F_1999	ERR907281	2082168	23	90529	639342	248042	3	09	09	23F	23	33	PCV7	VT		1999.6	1999	E1	E1B	4y	Pd
ERR907282_G1_22A_1999	ERR907282	2094534	33	63470.7	383810	118125	5	13	13	22A	22	433	NVT	NVT		1999.6	1999	E1	E1B	12-<24m	Pd
ERR907283_G1_NT_1999	ERR907283	2142240	47	45579.6	170398	97386	8	01	01	NT	NT	448	NVT	NVT	USANT-43	1999.7	1999	E1	E1B	2y	Pd
ERR907284_G1_22A_1999	ERR907284	2094274	32	65446.1	298986	112142	6	13	13	22A	22	433	NVT	NVT		1999.8	1999	E1	E1B	5y	Pd
ERR907285_G1_7B_1999	ERR907285	2127758	34	62581.1	270842	142585	5	26	26A	7B	7	1757	NVT	NVT		1999.8	1999	E1	E1B	2y	Pd
ERR907286_G1_8_1999	ERR907286	1985633	26	76370.5	393054	145610	5	27	27	8	8	1480	NVT	NVT		1999.9	1999	E1	E1B	5y	Pd
ERR907287_G1_22F_1999	ERR907287	2095333	41	51105.7	347444	88692	7	20	20	22F	22	1294	NVT	NVT		1999.9	1999	E1	E1B	4y	Pd
ERR907288_G1_14_1999	ERR907288	2112144	72	29335.3	211066	71498	9	12	12	14	14	2194	PCV7	VT		2000	1999	E1	E1B	5y	Pd
ERR907289_G1_6B_1999	ERR907289	2117513	34	62279.8	242981	147307	6	18	18	6C	6	2185	NVT	NVT		2000	1999	E1	E1B	5y	Pd
ERR907290_G5_35F_2011	ERR907290	2019817	39	51790.2	196633	71594	8	06	06A	35F	35	487	NVT	NVT		2011.3	2011	E3	E3B	6-<12m	Pd
ERR907291_G5_9I_2011	ERR907291	2111134	29	72797.7	431604	206529	4	27	27	9L	9	66	NVT	NVT		2011.6	2011	E3	E3B	12-<24m	Pd
ERR907293_G5_19F_2011	ERR907293	2071778	34	60934.7	302846	136019	6	27	27	19F	19	177	PCV7	VT	Portugal19F-21	2011.6	2011	E3	E3B	<6m	Pd
ERR907294_G5_10B_2011	ERR907294	2057265	42	48982.5	262359	100605	7	16	16B	10B	10	816	NVT	NVT		2011.6	2011	E3	E3B	3y	Pd
ERR907295_G5_10B_2011	ERR907295	2080630	35	59446.6	299039	129858	5	16	16B	10B	10	816	NVT	NVT		2011.7	2011	E3	E3B	12-<24m	Pd
ERR907296_G5_35B_2011	ERR907296	2076402	40	51910.1	163084	88600	9	11	11	35B	35	558	NVT	NVT		2011.8	2011	E3	E3B	2y	Pd
ERR907297_G5_3_2011	ERR907297	2018889	21	96137.6	327000	259676	4	02	02A	3	3	180	PCV13	NVT	Netherlands3-31	2011.9	2011	E3	E3B	5y	Pd
ERR907298_G5_15C_2011	ERR907298	2055095	26	79042.1	432260	194538	3	27	27	15C	15	NF	NVT	NVT		2011.9	2011	E3	E3B	2y	Pd
ERR907299_G5_31_2011	ERR907299	2038302	47	43368.1	190349	81055	9	05	05	31	31	1111	NVT	NVT		2012	2011	E3	E3B	5y	Pd
ERR907300_G5_6A_2011	ERR907300	2054339	42	48912.8	353601	92552	7	22	22	6C	6	146	NVT	NVT		2012	2011	E3	E3B	<6m	Pd
ERR907301_G5_NT_2011	ERR907301	2164936	68	31837.3	141800	55806	12	01	01	NT	NT	344	NVT	NVT	NorwayNT-42	2012	2011	E3	E3B	5y	Pd
ERR907302_G5_31_2012	ERR907302	2038480	46	44314.8	230440	91766	7	05	05	31	31	1111	NVT	NVT		2012	2012	E3	E3B	2y	Pd
ERR907303_G5_NT_2012	ERR907303	2153606	57	37782.6	272466	81520	8	01	01	NT	NT	448	NVT	NVT	USANT-43	2012	2012	E3	E3B	4y	Pd
ERR907304_G5_21_2012	ERR907304	2122931	39	54434.1	240889	92684	8	25	25	21	21	NF	NVT	NVT		2012.1	2012	E3	E3B	4y	Pd
ERR907305_G5_15C_2012	ERR907305	2083685	29	71851.2	305053	211038	4	25	25	15C	15	3065	NVT	NVT		2012.1	2012	E3	E3B	2y	Pd
ERR907306_G5_15C_2012	ERR907306	2082354	36	57843.2	227982	143194	6	25	25	15C	15	3065	NVT	NVT		2012.1	2012	E3	E3B	5y	Pd
ERR907307_G5_23B_2012	ERR907307	2086286	26	80241.8	413154	189846	4	09	09	23B	23	1847	NVT	NVT		2012.1	2012	E3	E3B	5y	Pd
ERR907308_G5_17F_2012	ERR907308	2008687	22	91303.9	354621	148957	5	19	19B	17F	17	1794	NVT	NVT		2012.1	2012	E3	E3B	4y	Pd
ERR907309_G5_35B_2012	ERR907309	2087282	38	54928.5	265773	118406	6	23	23	35B	15	162	NVT	NVT		2012.1	2012	E3	E3B	5y	Pd
ERR907310_G5_6A_2012	ERR907310	2054039	49	41919.2	131000	83872	10	22	22	6C	6	146	NVT	NVT		2012.1	2012	E3	E3B	3y	Pd
ERR907311_G5_23B_2012	ERR907311	2042755	21	97274.1	522046	267212	3	24	24	23B	23	1349	NVT	NVT		2012.2	2012	E3	E3B	3y	Pd
ERR907312_G5_17F_2010	ERR907312	2007035	25	80281.4	600947	196202	3	19	19B	17F	17	1794	NVT	NVT		2010.2	2010	E3	E3A	2y	Pd
ERR907313_G5_23A_2010	ERR907313	2111282	33	63978.2	267460	124786	5	24	24	23A	23	338	NVT	NVT	Colombia23F-26	2010.3	2010	E3	E3A	3y	Pd
ERR907314_G5_19A_2010	ERR907314	2110085	32	65940.2	390630	164507	4	26	26B	19A	19	199	PCV13	NVT		2010.3	2010	E3	E3A	<6m	Pd
ERR907315_G5_3_2010	ERR907315	2015025	25	80601	406115	308044	3	02	02A	3	3	180	PCV13	NVT	Netherlands3-31	2010.3	2010	E3	E3A	5y	Pd
ERR907316_G5_17F_2010	ERR907316	2007822	18	111546	418057	409052	3	19	19B	17F	17	1794	NVT	NVT		2010.3	2010	E3	E3A	5y	Pd
ERR907317_G5_7C_2010	ERR907317	2168069	66	32849.5	184335	59554	10	04	04A	7C	7	1797	NVT	NVT		2010.3	2010	E3	E3A	3y	Pd
ERR907318_G5_15C_2010	ERR907318	2103426	34	61865.5	212701	122119	7	26	26A	15C	15	4528	NVT	NVT		2010.3	2010	E3	E3A	6-<12m	Pd
ERR907319_G5_NT_2010	ERR907319	2145190	49	43779.4	246857	94999	8	01	01	NT	NT	448	NVT	NVT	USANT-43	2010.3	2010	E3	E3A	2y	Pd
ERR907320_G5_6A_2010	ERR907320	2127968	45	47288.2	169190	88367	9	21	21	6C	6	473	NVT	NVT		2010.3	2010	E3	E3A	6-<12m	Pd
ERR907321_G5_19A_2010	ERR907321	2102020	40	52550.5	307906	124205	6	26	26B	19A	19	199	PCV13	NVT		2010.4	2010	E3	E3A	12-<24m	Pd
ERR907322_G5_6A_2010	ERR907322	2052732	40	51318.3	203483	96043	8	22	22	6C	6	146	NVT	NVT		2010.4	2010	E3	E3A	12-<24m	Pd
ERR907323_G5_15A_2010	ERR907323	2069554	51	40579.5	194499	67804	9	15	15	15A	15	817	NVT	NVT		2010.4	2010	E3	E3A	12-<24m	Pd
ERR907324_G5_15C_2010	ERR907324	2085861	29	71926.2	261185	179370	5	26	26A	15C	15	199	NVT	NVT	Netherlands15B-37	2010.4	2010	E3	E3A	2y	Pd
ERR907325_G5_35B_2010	ERR907325	2142527	44	48693.8	196215	83893	9	08	08	35B	35	452	NVT	NVT		2010.4	2010	E3	E3A	<6m	Pd
ERR907326_G5_22A_2010	ERR907326	2099103	33	63609.2	261058	119343	6	13	13	22A	22	433	NVT	NVT		2010.4	2010	E3	E3A	5y	Pd
ERR907327_G5_16F_2010	ERR907327	2148106	44	48820.6	286936	123931	6	14	14	16F	16	1840	NVT	NVT		2010.5	2010	E3	E3A	3y	Pd
ERR907328_G5_15A_2010	ERR907328	2027920	44	46089.1	291443	65546	7	15	15	15A	15	817	NVT	NVT		2010.5	2010	E3	E3A	2y	Pd
ERR907329_G5_NT_2010	ERR907329	2167244	62	34955.6	194350	59322	10	01	01	NT	NT	344	NVT	NVT	NorwayNT-42	2010.6	2010	E3	E3A	4y	Pd
ERR907330_G5_15C_2010	ERR907330	2164924	43	50347.1	267466	91844	6	26	26A	15C	15	1757	NVT	NVT		2010.6	2010	E3	E3A	12-<24m	Pd
ERR907331_G5_3_2010	ERR907331	2014768	23	87598.6	451759	194360	4	02	02A	3	3	180	PCV13	NVT	Netherlands3-31	2010.6	2010	E3	E3A	2y	Pd
ERR907332_G5_5_2010	ERR907332	2116862	37	57212.5	212975	88376	8	21	21	6C	6	473	NVT	NVT		2010.6	2010	E3	E3A	<6m	Pd
ERR907333_G5_16F_2010	ERR907333	2095037	31	67581.8	380291	126427	6	14	14	16F	16	1840	NVT	NVT		2010.6	2010	E3	E3A	3y	Pd
ERR907334_G5_6A_2010	ERR907334	2052919	38	54024.2	246377	105590	7	22	22	6C	6	146	NVT	NVT		2010.7	2010	E3	E3A	12-<24m	Pd
ERR907335_G5_22A_2010	ERR907335	2064633	25	82585.3	257725	118501	7	13	13	22A	22	433*	NVT	NVT		2010.7	2010	E3	E3A	5y	Pd
ERR907336_G5_19A_2010	ERR907336	2142002	32	66937.6	317778	133185	5	26	26B	19A	19	199	PCV13	NVT		2010.7	2010	E3	E3A	5y	Pd
ERR907337_G5_11D_2010	ERR907337	2014424	29	69462.9	252610	128143	5	03	03A	11D	11	62	NVT	NVT		2010.8	2010	E3	E3A	<6m	Pd
ERR907338_G5_35B_2010	ERR907338	2088520	43	48570.2	321902	127147	5	23	23	35B	15	162	NVT	NVT		2010.8	2010	E3	E3A	2y	Pd
ERR907339_G5_19F_2010	ERR907339	2093334	52	40256.4	197177	64349	10	04	04C	19F	19	654	PCV7	VT		2010.8	2010	E3	E3A	2y	Pd
ERR907340_G5_19A_2010	ERR907340	2139040	48	44563.3	362025	106143	6	26	26B	19A	19	199	PCV13	NVT		2010.8	2010	E3	E3A	2y	Pd
ERR907341_G5_23B_2010	ERR907341	2061096	17	121241	622635	488195	2	09	09	23B	23	1448	NVT	NVT		2010.8	2010	E3	E3A	5y	Pd
ERR907342_G5_35B_2010	ERR907342	2102591	42	50061.7	261450	104170	8	08	08	35B	35	452	NVT	NVT		2010.9	2010	E3	E3A	2y	Pd
ERR907343_G5_15C_2010	ERR907343	2131474	37	57607.4	266339	153320	5	26	26A	15C	15	1757	NVT	NVT		2010.9	2010	E3	E3A	6-<12m	Pd
ERR907344_G5_15C_2010	ERR907344	2117110	47	45044.9	265909	135449	6	23	23	15C	15	162	NVT	NVT		2010.9	2010	E3	E3A	3y	Pd
ERR907345_G5_34_2010	ERR907345	2062744	23	89684.5	345312	204861	4	20	20	34	34	547	NVT	NVT		2011	2010	E3	E3A	2y	Pd
ERR907346_G5_NT_2011	ERR907346	2160602	70	30865.7	142264	53562	14	01	01	NT	NT	344	NVT	NVT	NorwayNT-42	2011	2011	E3	E3B	3y	Pd
ERR907347_G5_NT_2011	ERR907347	2177557	76	28652.1	155433	56826	12	01	01	NT	NT	2315	NVT	NVT		2011	2011	E3	E3B	5y	Pd
ERR907348_G5_34_2011	ERR907348	2084496	22	94749.8	357624	265162	4	20	20	34	34	547	NVT	NVT		2011	2011	E3	E3B	2y	Pd
ERR907349_G5_34_2011	ERR907349	2119910	26	81535	371482	202573	4	20	20	34	34	547	NVT	NVT		2011	2011	E3	E3B	3y	Pd
ERR907350_G5_11D_2011	ERR907350	2046242	32	63945.1	245432	118425	6	03	03A	11D	11	9750	NVT	NVT		2011.1	2011	E3	E3B	4y	Pd
ERR907351_G5_3_2011	ERR907351	2019009	27	74778.1	480798	136922	4	02	02A	3	3	180	PCV13	NVT	Netherlands3-31	2011.1	2011	E3	E3B	3y	Pd
ERR907352_G5_23B_2011	ERR907352	2130275	25	85211	346509	189935	4	09	09	23B	23	1847	NVT	NVT		2011.1	2011	E3	E3B	6-<12m	Pd
ERR907353_G5_22A_2011	ERR907353	2054847	34	60436.7	157387	99505	9	13	13	22A	22	433	NVT	NVT		2011.2	2011	E3	E3B	6-<12m	Pd
ERR907354_G5_16F_2011	ERR907354	2111830	29	72821.7	390834	190566	4	14	14	16F	16	1840	NVT	NVT		2011.2	2011	E3	E3B	12-<24m	Pd
ERR907355_G5_7C_2011	ERR907355	2061772	28	73634.7	247756	134743	6	04	04A	7C	7	4510	NVT	NVT		2011.2	2011	E3	E3B	5y	Pd
ERR907356_G5_7C_2011	ERR907356	2070126	52	39810.1	175375	94306	8	04	04A	7C	7	1797	NVT	NVT		2011.2	2011	E3	E3B	6-<12m	Pd
ERR907357_G5_35B_2011	ERR907357	2001234	44	45482.6	175188	86141	9	11	11	35B	35	558	NVT	NVT		2011.2	2011	E3	E3B	6-<12m	Pd
ERR907358_G5_34_2011	ERR907358	2114194	22	96099.7	444039	310830	3	20	20	34	34	547	NVT	NVT		2011.2	2011	E3	E3B	5y	Pd
ERR907359_G5_22A_2011	ERR907359	2083533	27	77167.9	309346	122202	6	13	13	22A	22	433	NVT	NVT		2011.2	2011	E3	E3B	4y	Pd
ERR907361_G5_23B_2011	ERR907361	2122963	30	70765.4	320461	125109	5	09	09	23B	23	439	NVT	NVT		2011.3	2011	E3	E3B	6-<12m	Pd
ERR907362_G5_16F_2011	ERR907362	2083877	32	65121.2	343493	257694	4	27	27	16F	16	659	NVT	NVT		2011.3	2011	E3	E3B	4y	Pd
ERR907363_G5_23B_2011	ERR907363	2081927	23	90518.6	582234	130678	3	09	09	23B	23	1448	NVT	NVT		2011.3	2011	E3	E3B	<6m	Pd
ERR907364_G5_19F_2011	ERR907364	2097254	47	44622.4	226068	76605	8	04	04C	19F	19	654	PCV7	VT		2011.4	2011	E3	E3B	6-<12m	Pd
ERR907365_G5_35B_2011	ERR907365	2097401	54	38840.8	195966	71073	10	08	08	35B	35	452	NVT	NVT		2011.4	2011	E3	E3B	6-<12m	Pd
ERR907366_G5_9I_2011	ERR907366	2077401	24	86558.4	618029	140308	3	27	27	9L	9	66	NVT	NVT		2011.4	2011	E3	E3B	12-<24m	Pd
ERR907367_G5_15C_2011	ERR907367	2165673	56	38672.7	265756	117206	6	23	23	15C	15	162	NVT	NVT		2011.4	2011	E3	E3B	6-<12m	Pd
ERR907368_G5_34_2011	ERR907368	2118288	39	54315.1	272665	167730	5	20	20	34	34	547	NVT	NVT		2011.4	2011	E3	E3B	5y	Pd
ERR907369_G5_35B_2011	ERR907369	2001381	31	64560.7	172719	89643	8	11	11	35B	35	NF	NVT	NVT		2011.4	2011	E3	E3B	4y	Pd
ERR907370_G5_15A_2011	ERR907370	2102522	41	51281	224931	102936	8	27	27	15A	15	63	NVT	NVT	Sweden15A-25	2011.5	2011	E3	E3B	5y	Pd
ERR907371_G5_10A_2011	ERR907371	2059390	26	79207.3	337916	148314	4	16	16B	10A	10	97	NVT	NVT		2011.6	2011	E3	E3B	<6m	Pd
ERR907372_G5_15C_2011	ERR907372	2050928	29	70721.7	488347	139696	4	26	26A	15C	15	199	NVT	NVT	Netherlands15B-37	2011.6	2011	E3	E3B	2y	Pd
ERR907373_G5_15C_2011	ERR907373	2084345	27	77198	261447	132018	6	26	26A	15C	15	199	NVT	NVT	Netherlands15B-37	2011.6	2011	E3	E3B	3y	Pd
ERR907374_G5_16F_2011	ERR907374	2034586	76	26770.9	145180	65184	11	27	27	16F	16	659	NVT	NVT		2011.6	2011	E3	E3B	4y	Pd
ERR907375_G5_21_2011	ERR907375	2105092	49	42961.1	143092	80414	10	25	25	21	21	193	NVT	NVT	Greece21-30	2011.7	2011	E3	E3B	<6m	Pd
ERR907376_G1_6B_1999	ERR907376	2054405	34	60423.7	262233	116990	6	21	21	6A	6	3053*	PCV13	VT		2000	1999	E1	E1B	12-<24m	Pd
ERR907377_G1_19F_1999	ERR907377	2056842	49	41976.4	263633	127266	6	04	04C	19F	19	251	PCV7	VT		2000	1999	E1	E1B	12-<24m	Pd
ERR907378_G1_35B_2000	ERR907378	2138022	46	46478.7	196351	94127	9	08	08	35B	35	452	NVT	NVT		2000.1	2000	E1	E1B	2y	Pd
ERR907379_G1_4_1999	ERR907379	2110775	49	43077	263739	90496	8	27	27	4	4	205	PCV7	VT	Sweden4-38	1999.8	1999	E1	E1B	<6m	Pd
ERR907380_G1_16F_1999	ERR907380	2074033	32	64813.5	285113	146473	5	27	27	16F	16	NF	NVT	NVT		2000	1999	E1	E1B	5y	Pd
ERR907381_G1_35A_1999	ERR907381	2075773	32	64867.9	326001	179733	4	07	07	35A	35	NF	NVT	NVT		1999.2	1999	E1	E1B	3y	Pd
ERR907382_G1_6A_1999	ERR907382	2069294	39	53058.8	313403	83734	6	17	17	6A	6	395	PCV13	VT		1999.2	1999	E1	E1B	3y	Pd
ERR907383_G1_20_1999	ERR907383	2084122	31	67229.7	394028	123892	6	27	27	20	20	NF	NVT	NVT		1999.2	1999	E1	E1B	3y	Pd
ERR907384_G1_35A_1999	ERR907384	2040917	25	81636.7	390266	240047	4	07	07	35A	35	4518	NVT	NVT		1999.3	1999	E1	E1B	3y	Pd
ERR907385_G1_35B_1999	ERR907385	2102000	49	42898	159799	81492	10	08	08	35B	35	452	NVT	NVT		1999.3	1999	E1	E1B	12-<24m	Pd
ERR907386_G1_23F_1999	ERR907386	2073078	24	86378.2	570617	273502	3	09	09	23F	23	833	PCV7	VT		1999.3	1999	E1	E1B	6-<12m	Pd
ERR907387_G1_15C_1999	ERR907387	2082714	35	59506.1	590901	148927	4	26	26A	15C	15	1757	NVT	NVT		1999.3	1999	E1	E1B	2y	Pd
ERR907388_G1_6B_1999	ERR907388	2066575	27	76539.8	508724	148345	4	18	18	6C	6	3101	NVT	NVT		1999.4	1999	E1	E1B	4y	Pd
ERR907389_G1_15C_1999	ERR907389	2171903	53	40979.3	385863	147871	5	26	26A	15C	15	199	NVT	NVT	Netherlands15B-37	1999.4	1999	E1	E1B	5y	Pd
ERR907390_G1_6A_1999	ERR907390	2115171	38	55662.4	330201	79680	7	17	17	6A	6	395	PCV13	VT		1999.5	1999	E1	E1B	5y	Pd
ERR907391_G1_5_1999	ERR907391	2105771	53	39731.5	264699	101422	6	04	04A	5	5	2011	PCV13	NVT		1999.5	1999	E1	E1B	5y	Pd
ERR907392_G1_11D_1999	ERR907392	2012232	34	59183.3	337563	97244	5	03	03A	11D	11	62	NVT	NVT		1999.5	1999	E1	E1B	5y	Pd
ERR907393_G1_14_1999	ERR907393	2108201	62	34003.2	138371	72481	11	12	12	14	14	124	PCV7	VT	Netherlands14-35	1999.6	1999	E1	E1B	5y	Pd
ERR907394_G1_14_1999	ERR907394	2067176	32	64599.2	280949	120093	6	12	12	14	14	782	PCV7	VT		1999.6	1999	E1	E1B	4y	Pd
ERR907395_G1_19A_1999	ERR907395	2120558	38	55804.2	256834	132205	6	26	26B	19A	19	199	PCV13	NVT		1999.5	1999	E1	E1B	4y	Pd
ERR907396_G1_19A_1999	ERR907396	2143404	38	56405.4	353819	141037	5	26	26B	19A	19	199	PCV13	NVT		1999.5	1999	E1	E1B	2y	Pd
ERR907397_G1_23F_1999	ERR907397	2103137	52	40444.9	237192	88230	8	27	27	23F	23	242	PCV7	VT	Taiwan23F-15	1999.5	1999	E1	E1B	12-<24m	Pd
ERR907398_G1_19A_1999	ERR907398	2140772	39	54891.6	291420	136860	6	26	26B	19A	19	199	PCV13	NVT		1999.6	1999	E1	E1B	2y	Pd
ERR907399_G1_19A_1999	ERR907399	2118801	32	66212.5	380000	132333	4	26	26B	19A	19	199	PCV13	NVT		1999.6	1999	E1	E1B	2y	Pd
ERR907400_G1_6A_1999	ERR907400	2130105	46	46306.6	212927	87466	8	21	21	6C	6	473	NVT	NVT		1999.4	1999	E1	E1B	6-<12m	Pd
ERR907401_G1_NT_1999	ERR907401	2145199	55	39003.6	160637	94993	9	01	01	NT	NT	NF*	NVT	NVT		1999.4	1999	E1	E1B	<6m	Pd
ERR907402_G1_35B_1999	ERR907402	2131366	51	41791.5	217666	71761	9	08	08	35B	35	452	NVT	NVT		1999.3	1999	E1	E1B	2y	Pd
ERR907403_G1_23F_1999	ERR907403	2101017	51	41196.4	157511	64459	12	27	27	23F	23	242	PCV7	VT	Taiwan23F-15	1999.3	1999	E1	E1B	6-<12m	Pd
ERR907404_G1_7A_1999	ERR907404	1998434	52	38431.4	164670	67070	11	27	27	7A	7	191	NVT	NVT	Netherlands7F-39	1999.7	1999	E1	E1B	5y	Pd
ERR907405_G1_34_1999	ERR907405	2083358	24	86806.6	431888	194705	4	20	20	34	34	547	NVT	NVT		1999.7	1999	E1	E1B	5y	Pd
ERR907406_G1_6A_1999	ERR907406	2068572	46	44969	292858	80557	8	17	17	6A	6	395	PCV13	VT		1999.8	1999	E1	E1B	4y	Pd
ERR907407_G1_35F_1999	ERR907407	2059827	29	71028.5	374601	128939	6	06	06A	35F	35	487	NVT	NVT		1999.8	1999	E1	E1B	4y	Pd
ERR907408_G1_6A_1999	ERR907408	2066895	36	57413.8	457001	153747	4	17	17	6A	6	395	PCV13	VT		1999.8	1999	E1	E1B	<6m	Pd
ERR907409_G1_4_2000	ERR907409	2111995	51	41411.7	218988	74639	9	27	27	4	4	205	PCV7	VT	Sweden4-38	2000.1	2000	E1	E1B	12-<24m	Pd
ERR907410_G1_23F_2000	ERR907410	2073566	27	76798.7	569521	214896	3	09	09	23F	23	833	PCV7	VT		2000.1	2000	E1	E1B	5y	Pd
ERR907411_G1_NT_2000	ERR907411	2144995	51	42058.7	159609	95864	9	01	01	NT	NT	448	NVT	NVT	USANT-43	2000.1	2000	E1	E1B	4y	Pd
ERR907412_G1_NT_2000	ERR907412	2146137	47	45662.5	274351	92821	7	01	01	NT	NT	448	NVT	NVT	USANT-43	2000.1	2000	E1	E1B	5y	Pd
ERR907413_G1_9A_2000	ERR907413	2152684	54	39864.5	245375	76738	9	23	23	9V	9	1269	PCV7	VT		2000.2	2000	E1	E1B	5y	Pd
ERR907414_G1_23A_2000	ERR907414	2134934	27	79071.6	362719	223532	4	09	09	23A	23	1448	NVT	NVT		2000.2	2000	E1	E1B	4y	Pd
ERR907415_G1_6A_2000	ERR907415	2234044	72	31028.4	269834	59911	12	27	27	6A	6	315	PCV13	VT	Poland6B-20	2000.2	2000	E1	E1B	4y	Pd
ERR907416_G1_6B_2000	ERR907416	2055038	45	45667.5	285824	80366	7	18	18	6C	6	1390	NVT	NVT		2000.3	2000	E1	E1B	2y	Pd
ERR907417_G1_15C_2000	ERR907417	2156425	54	39933.8	255960	138852	6	26	26A	15C	15	1757	NVT	NVT		2000.3	2000	E1	E1B	5y	Pd
ERR907418_G1_9A_2000	ERR907418	2104045	30	70134.8	243366	119057	6	23	23	9V	9	1206	PCV7	VT		2000.3	2000	E1	E1B	5y	Pd
ERR907419_G1_NT_2000	ERR907419	2120917	52	40786.9	199292	82885	9	27	27	NT	NT	NF	NVT	NVT		2000.1	2000	E1	E1B	4y	Pd
ERR907420_G1_6A_2000	ERR907420	2070940	40	51773.5	258850	83761	6	17	17	6A	6	395	PCV13	VT		2000.1	2000	E1	E1B	2y	Pd
ERR907421_G1_6A_2000	ERR907421	2070409	29	71393.4	414997	111963	5	17	17	6A	6	395	PCV13	VT		2000.1	2000	E1	E1B	4y	Pd
ERR907422_G1_6A_2000	ERR907422	2136546	45	47478.8	255733	106998	7	22	22	6E	6	146	NVT	VT		2000.2	2000	E1	E1B	2y	Pd
ERR907423_G1_35B_2000	ERR907423	2002210	32	62569.1	157974	93860	8	11	11	35B	35	558	NVT	NVT		2000.2	2000	E1	E1B	2y	Pd
ERR907424_G1_6A_2000	ERR907424	2070018	33	62727.8	302319	113497	6	17	17	6A	6	395	PCV13	VT		2000.3	2000	E1	E1B	5y	Pd
ERR907425_G1_23B_1999	ERR907425	2125863	27	78735.7	516101	190269	4	09	09	23B	23	439	NVT	NVT		1999.7	1999	E1	E1B	4y	Pd
ERR907426_G1_31_1999	ERR907426	2041229	35	58320.8	335626	193414	4	05	05	31	31	1111	NVT	NVT		1999.8	1999	E1	E1B	12-<24m	Pd
ERR907427_G1_NT_1999	ERR907427	2103900	84	25046.4	131540	48008	14	01	01	NT	NT	1054	NVT	NVT		2000	1999	E1	E1B	.	Pd
ERR907428_G1_NT_2000	ERR907428	2156649	66	32676.5	176727	71322	10	01	01	NT	NT	344	NVT	NVT	NorwayNT-42	2000	2000	E1	E1B	<6m	Pd
ERR907429_G1_22F_2000	ERR907429	2094400	37	56605.4	341075	112314	7	20	20	22F	22	1294	NVT	NVT		2000.2	2000	E1	E1B	12-<24m	Pd
ERR907430_G1_22F_2000	ERR907430	2093408	35	59811.7	331313	111801	7	20	20	22F	22	1294	NVT	NVT		2000.2	2000	E1	E1B	<6m	Pd
ERR907431_G1_14_1999	ERR907431	2129379	58	36713.4	151412	78779	9	12	12	14	14	2194	PCV7	VT		1999.8	1999	E1	E1B	<6m	Pd
ERR907432_G1_22A_2000	ERR907432	2053759	26	78990.7	298797	118381	6	13	13	22A	22	433	NVT	NVT		2001	2000	E1	E1B	<6m	Pd
ERR907433_G1_6A_2001	ERR907433	2055828	43	47809.9	204974	106669	8	22	22	6E	6	146	NVT	VT		2002	2001	E1	E1B	<6m	Pd
ERR907434_G1_15C_2001	ERR907434	2128525	35	60815	340484	131590	5	26	26A	15C	15	1757	NVT	NVT		2002.1	2001	E1	E1B	<6m	Pd
ERR907435_G1_35B_2001	ERR907435	2101720	45	46704.9	195759	81489	9	08	08	35B	35	452	NVT	NVT		2002.2	2001	E1	E1B	<6m	Pd
ERR907436_G1_9A_2001	ERR907436	2106296	37	56926.9	327024	95624	6	23	23	9V	9	1269	PCV7	VT		2002.3	2001	E1	E1B	<6m	Pd
ERR907437_G1_17F_1999	ERR907437	2080624	34	61194.8	315561	107686	6	06	06B	17F	17	392	NVT	NVT		1999.8	1999	E1	E1B	<6m	Pd
ERR907438_G1_23B_1999	ERR907438	2127604	25	85104.2	409983	179202	4	09	09	23B	23	439	NVT	NVT		1999.9	1999	E1	E1B	<6m	Pd
ERR907439_G1_6B_2000	ERR907439	2104495	31	67886.9	320931	141972	5	20	20	6C	6	547	NVT	NVT		2001	2000	E1	E1B	<6m	Pd
ERR907440_G1_19A_2000	ERR907440	2101057	40	52526.4	252967	94336	8	04	04B	19F	19	3040	PCV13	NVT		2001	2000	E1	E1B	<6m	Pd
ERR907441_G1_22F_1998	ERR907441	2088462	33	63286.7	339923	127222	6	20	20	22F	22	1294	NVT	NVT		1998.2	1998	E1	E1A	3y	Pd
ERR907442_G1_35F_1998	ERR907442	2060145	27	76301.7	210686	144170	6	06	06A	35F	35	487	NVT	NVT		1998.3	1998	E1	E1A	5y	Pd
ERR907443_G1_19F_1998	ERR907443	2096812	47	44613	342442	78750	6	04	04C	19F	19	654	PCV7	VT		1998.6	1998	E1	E1A	3y	Pd
ERR907444_G1_14_1998	ERR907444	2120057	52	40770.3	203712	88243	9	12	12	14	14	3049	PCV7	VT		1998.5	1998	E1	E1A	2y	Pd
ERR907445_G1_14_1998	ERR907445	2183219	64	34112.8	161630	67676	12	12	12	14	14	3049	PCV7	VT		1998.5	1998	E1	E1A	2y	Pd
ERR907446_G1_14_1998	ERR907446	2069175	49	42228.1	132654	87590	10	12	12	14	14	124	PCV7	VT	Netherlands14-35	1998.8	1998	E1	E1A	3y	Pd
ERR907447_G1_14_1998	ERR907447	2199044	50	43980.9	187041	72224	9	12	12	14	14	3049	PCV7	VT		1998.8	1998	E1	E1A	6-<12m	Pd
ERR907448_G1_23F_1998	ERR907448	2101537	50	42030.7	219316	71930	10	27	27	23F	23	242	PCV7	VT	Taiwan23F-15	1998.8	1998	E1	E1A	6-<12m	Pd
ERR907449_G1_6B_1998	ERR907449	2108226	24	87842.8	388191	183763	4	18	18	6C	6	1379	NVT	NVT		1998.8	1998	E1	E1A	6-<12m	Pd
ERR907450_G1_14_1998	ERR907450	2014134	47	42853.9	186248	74159	9	12	12	14	14	124	PCV7	VT	Netherlands14-35	1998.7	1998	E1	E1A	3y	Pd
ERR907451_G1_18B_1998	ERR907451	2090082	38	55002.2	358845	164944	5	27	27	18B	18	133	NVT	NVT		1998.7	1998	E1	E1A	12-<24m	Pd
ERR907452_G1_16F_1998	ERR907452	2145300	33	65009.1	222189	127923	7	14	14	16F	16	1840	NVT	NVT		1998.8	1998	E1	E1A	5y	Pd
ERR907453_G1_23F_1998	ERR907453	2073184	20	103659	569543	178876	3	09	09	23F	23	833	PCV7	VT		1998.9	1998	E1	E1A	3y	Pd
ERR907454_G1_9I_1998	ERR907454	2030995	36	56416.5	404707	118273	6	27	27	9L	9	3061	NVT	NVT		1998.9	1998	E1	E1A	4y	Pd
ERR907455_G1_23F_1998	ERR907455	2073727	24	86405.3	784214	350502	2	09	09	23F	23	833	PCV7	VT		1998.9	1998	E1	E1A	3y	Pd
ERR907456_G1_17F_1998	ERR907456	2008042	18	111558	347480	259099	4	19	19B	17F	17	1794	NVT	NVT		1998.9	1998	E1	E1A	2y	Pd
ERR907457_G1_23F_1998	ERR907457	2076481	23	90281.8	371450	236707	4	09	09	23F	23	37	PCV7	VT	Tennessee23F-4	1998.9	1998	E1	E1A	2y	Pd
ERR907458_G1_6A_1998	ERR907458	2100085	43	48839.2	268049	105426	7	22	22	6E	6	1060	NVT	VT		1998.9	1998	E1	E1A	6-<12m	Pd
ERR907459_G1_6A_1998	ERR907459	2196645	34	64607.2	300597	119682	6	22	22	6E	6	90	NVT	VT	Spain6B-2	1998.9	1998	E1	E1A	5y	Pd
ERR907460_G1_6A_1998	ERR907460	2163320	39	55469.7	285843	94175	7	21	21	6C	6	473	NVT	NVT		1998.9	1998	E1	E1A	4y	Pd
ERR907461_G1_21_1998	ERR907461	2109774	38	55520.4	314067	88274	6	25	25	21	21	193	NVT	NVT	Greece21-30	1998.8	1998	E1	E1A	3y	Pd
ERR907462_G4_19A_2007	ERR907462	2093277	32	65414.9	341269	162311	5	23	23	19A	15	156	PCV13	NVT		2007.4	2007	E2	E2B	6-<12m	Pd
ERR907463_G2_6B_2006	ERR907463	2057911	44	46770.7	329010	92032	7	18	18	6C	6	1390	NVT	NVT		2006.3	2006	E2	E2A	7y	Ad
ERR907464_G4_22A_2006	ERR907464	2058612	42	49014.6	204028	97399	8	13	13	22A	22	433	NVT	NVT		2006.3	2006	E2	E2A	5y	Pd
ERR907465_G3_23B_2007	ERR907465	2124555	29	73260.5	345410	171831	5	09	09	23B	23	439	NVT	NVT		2007.6	2007	E2	E2B	12-<24m	Pd
ERR907466_G2_3_2007	ERR907466	1964725	22	89305.7	264281	179566	5	02	02A	3	3	180	PCV13	NVT	Netherlands3-31	2007.4	2007	E2	E2B	6y	Ad
ERR907467_G2_38_2006	ERR907467	2194624	96	22860.7	163102	46050	14	27	27	38	38	393	NVT	NVT		2006.4	2006	E2	E2A	7y	Ad
ERR907468_G4_23B_2007	ERR907468	2120871	30	70695.7	371270	125115	4	09	09	23B	23	439	NVT	NVT		2007.4	2007	E2	E2B	6-<12m	Pd
ERR907469_G4_15C_2007	ERR907469	2108998	37	56999.9	307609	97584	6	26	26A	15C	15	199	NVT	NVT	Netherlands15B-37	2007.7	2007	E2	E2B	12-<24m	Pd
ERR907470_G4_34_2007	ERR907470	2084207	28	74436	357709	225234	4	20	20	34	34	547	NVT	NVT		2007.7	2007	E2	E2B	6-<12m	Pd
ERR907471_G4_19A_2006	ERR907471	2029041	32	63407.5	610187	130217	4	10	10	19A	19	320	PCV13	NVT		2006.4	2006	E2	E2A	6-<12m	Pd
ERR907472_G4_15C_2007	ERR907472	2092204	40	52305.1	257165	118967	6	26	26A	15C	15	199	NVT	NVT	Netherlands15B-37	2007.7	2007	E2	E2B	6-<12m	Pd
ERR907473_G4_34_2007	ERR907473	2085329	24	86888.7	553509	532031	2	20	20	34	34	547	NVT	NVT		2007.7	2007	E2	E2B	5y	Pd
ERR907474_G3_17F_2007	ERR907474	2006973	24	83623.9	473331	260192	3	19	19B	17F	17	1794	NVT	NVT		2007.7	2007	E2	E2B	6-<12m	Pd
ERR907475_G4_15A_2007	ERR907475	1997438	36	55484.4	240574	170166	5	19	19A	15A	15	3058	NVT	NVT		2007.7	2007	E2	E2B	6-<12m	Pd
ERR907476_G3_22A_2007	ERR907476	2059702	43	47900.1	218387	70001	9	13	13	22A	22	433	NVT	NVT		2007.7	2007	E2	E2B	12-<24m	Pd
ERR907477_G2_15C_2007	ERR907477	2139624	42	50943.4	422985	128587	5	26	26A	15C	15	199	NVT	NVT	Netherlands15B-37	2007.4	2007	E2	E2B	18-49y	Ad
ERR907478_G2_37_2007	ERR907478	2009218	44	45664.1	252929	87453	7	27	27	37	37	447*	NVT	NVT		2007.7	2007	E2	E2B	18-49y	Ad
ERR907479_G3_6A_2007	ERR907479	2129130	40	53228.2	208557	88538	9	21	21	6C	6	473	NVT	NVT		2007.7	2007	E2	E2B	5y	Pd
ERR907480_G4_15A_2007	ERR907480	2035962	32	63623.8	305857	162950	5	19	19A	15A	15	3058	NVT	NVT		2007.7	2007	E2	E2B	6-<12m	Pd
ERR907481_G4_15A_2007	ERR907481	2035048	38	53553.9	225821	118287	6	19	19A	15A	15	3058	NVT	NVT		2007.7	2007	E2	E2B	12-<24m	Pd
ERR907482_G4_3_2007	ERR907482	1986628	30	66220.9	264475	129719	6	02	02A	3	3	1119	PCV13	NVT		2007.4	2007	E2	E2B	3y	Pd
ERR907483_G2_6B_2006	ERR907483	2098558	28	74948.5	326685	157410	5	18	18	6C	6	1379	NVT	NVT		2006.4	2006	E2	E2A	18-49y	Ad
ERR907484_G4_35A_2007	ERR907484	2040395	24	85016.5	373670	260962	4	07	07	35A	35	4518	NVT	NVT		2007.3	2007	E2	E2B	<6m	Pd
ERR907486_G2_22F_2006	ERR907486	2076703	40	51917.6	435822	127769	5	27	27	22F	22	3705	NVT	NVT		2006.5	2006	E2	E2A	7y	Ad
ERR907487_G3_35B_2007	ERR907487	2077283	45	46161.8	180666	94337	9	08	08	35B	35	452	NVT	NVT		2007.4	2007	E2	E2B	<6m	Pd
ERR907488_G2_19A_2007	ERR907488	2027406	37	54794.8	339967	95021	6	10	10	19A	19	320	PCV13	NVT		2007.4	2007	E2	E2B	18-49y	Ad
ERR907489_G3_21_2006	ERR907489	2111210	44	47982.1	306919	103723	7	25	25	21	21	193	NVT	NVT	Greece21-30	2006.6	2006	E2	E2A	12-<24m	Pd
ERR907490_G3_21_2006	ERR907490	2110489	49	43071.2	306376	81133	9	25	25	21	21	193	NVT	NVT	Greece21-30	2006.6	2006	E2	E2A	3y	Pd
ERR907491_G3_10A_2007	ERR907491	2060355	60	34339.2	148728	65257	11	02	02B	10A	10	1263	NVT	NVT		2007.5	2007	E2	E2B	<6m	Pd
ERR907492_G4_3_2006	ERR907492	1984490	40	49612.2	372790	162160	4	02	02A	3	3	1119	PCV13	NVT		2006.7	2006	E2	E2A	3y	Pd
ERR907493_G4_16F_2006	ERR907493	2104681	37	56883.3	327929	160635	5	14	14	16F	16	1840	NVT	NVT		2006.7	2006	E2	E2A	3y	Pd
ERR907494_G3_31_2007	ERR907494	2040653	46	44362	176213	90271	8	05	05	31	31	1111	NVT	NVT		2007.5	2007	E2	E2B	2y	Pd
ERR907495_G3_22A_2006	ERR907495	2023637	26	77832.2	257666	118518	6	13	13	22A	22	433	NVT	NVT		2006.6	2006	E2	E2A	6-<12m	Pd
ERR907496_G2_6B_2007	ERR907496	2064974	30	68832.5	422648	125683	4	18	18	6C	6	3101	NVT	NVT		2007	2007	E2	E2B	7y	Ad
ERR907497_G2_6B_2007	ERR907497	2064118	29	71176.5	509061	128819	4	18	18	6C	6	3101	NVT	NVT		2007	2007	E2	E2B	18-49y	Ad
ERR907498_G3_34_2006	ERR907498	2112932	42	50307.9	320642	124783	6	20	20	34	34	547	NVT	NVT		2006.6	2006	E2	E2A	2y	Pd
ERR907499_G2_17F_2007	ERR907499	2077531	40	51938.3	259955	99474	7	06	06B	17F	17	392	NVT	NVT		2007	2007	E2	E2B	18-49y	Ad
ERR907500_G2_16F_2006	ERR907500	2071321	30	69044	341688	171082	5	27	27	16F	16	570	NVT	NVT		2006.6	2006	E2	E2A	7y	Ad
ERR907501_G2_23A_2007	ERR907501	2085852	42	49663.1	288497	97086	7	24	24	23A	23	338	NVT	NVT	Colombia23F-26	2007	2007	E2	E2B	18-49y	Ad
ERR907502_G2_NT_2007	ERR907502	2164504	71	30486	154743	56324	12	01	01	NT	NT	4524	NVT	NVT		2007.1	2007	E2	E2B	18-49y	Ad
ERR907503_G4_35A_2007	ERR907503	2040716	29	70369.5	304179	167144	5	07	07	35A	35	4518	NVT	NVT		2007.1	2007	E2	E2B	6-<12m	Pd
ERR907504_G4_35A_2007	ERR907504	2039612	23	88678.8	390353	239962	4	07	07	35A	35	4518	NVT	NVT		2007.1	2007	E2	E2B	2y	Pd
ERR907505_G4_35B_2007	ERR907505	2124616	51	41659.1	342133	88783	7	23	23	35B	15	162	NVT	NVT		2007.1	2007	E2	E2B	<6m	Pd
ERR907506_G4_35B_2007	ERR907506	2126380	43	49450.7	247662	84029	8	23	23	35B	15	162	NVT	NVT		2007.1	2007	E2	E2B	4y	Pd
ERR907507_G2_34_2007	ERR907507	2082433	23	90540.6	465547	272634	3	20	20	34	34	547	NVT	NVT		2007.1	2007	E2	E2B	7y	Ad
ERR907508_G3_6B_2006	ERR907508	2058073	41	50196.9	283730	105552	7	18	18	6C	6	1390	NVT	NVT		2006.6	2006	E2	E2A	12-<24m	Pd
ERR907509_G4_17F_2007	ERR907509	2006741	25	80269.6	417203	196081	3	19	19B	17F	17	1794	NVT	NVT		2007.1	2007	E2	E2B	12-<24m	Pd
ERR907510_G4_17F_2007	ERR907510	2006312	28	71654	259163	148885	5	19	19B	17F	17	1794	NVT	NVT		2007.1	2007	E2	E2B	4y	Pd
ERR907511_G2_16F_2007	ERR907511	2069185	32	64662	308971	160673	5	14	14	16F	16	1840	NVT	NVT		2007.1	2007	E2	E2B	7y	Ad
ERR907512_G2_3_2006	ERR907512	1980869	22	90039.5	407448	193662	4	02	02A	3	3	180	PCV13	NVT	Netherlands3-31	2006.7	2006	E2	E2A	8y	Ad
ERR907513_G2_6B_2006	ERR907513	2058393	36	57177.6	298344	125147	6	18	18	6C	6	1390	NVT	NVT		2006.7	2006	E2	E2A	65+y	Ad
ERR907514_G2_34_2007	ERR907514	2082937	28	74390.6	358417	222814	4	20	20	34	34	547	NVT	NVT		2007.1	2007	E2	E2B	18-49y	Ad
ERR907515_G4_6B_2007	ERR907515	2067264	24	86136	230149	196372	5	18	18	6C	6	3101	NVT	NVT		2007.1	2007	E2	E2B	3y	Pd
ERR907516_G3_35B_2007	ERR907516	2125809	45	47240.2	265828	62212	8	23	23	35B	15	162	NVT	NVT		2007.2	2007	E2	E2B	<6m	Pd
ERR907517_G4_23B_2007	ERR907517	2125211	29	73283.1	339732	178635	5	09	09	23B	23	439	NVT	NVT		2007.2	2007	E2	E2B	6-<12m	Pd
ERR907518_G4_22A_2006	ERR907518	2093578	41	51062.9	210174	85039	7	13	13	22A	22	433	NVT	NVT		2006.8	2006	E2	E2A	5y	Pd
ERR907519_G4_22A_2006	ERR907519	2092985	47	44531.6	313670	83027	8	13	13	22A	22	433	NVT	NVT		2006.8	2006	E2	E2A	4y	Pd
ERR907520_G3_22A_2007	ERR907520	2053638	41	50088.7	255385	78229	9	13	13	22A	22	433	NVT	NVT		2007.6	2007	E2	E2B	4y	Pd
ERR907521_G2_16F_2007	ERR907521	2069172	29	71350.8	286907	154885	6	14	14	16F	16	1840	NVT	NVT		2007.2	2007	E2	E2B	7y	Ad
ERR907522_G4_15C_2006	ERR907522	2083971	34	61293.3	200881	163965	6	25	25	15C	15	3065	NVT	NVT		2006.8	2006	E2	E2A	5y	Pd
ERR907523_G2_37_2007	ERR907523	2043399	17	120200	378203	257467	4	03	03B	37	37	100	NVT	NVT		2007.2	2007	E2	E2B	18-49y	Ad
ERR907524_G2_35B_2006	ERR907524	2080088	37	56218.6	244592	85919	8	08	08	35B	35	452	NVT	NVT		2006.8	2006	E2	E2A	8y	Ad
ERR907525_G3_23B_2007	ERR907525	2125836	36	59051	410835	105191	6	27	27	23B	23	4507	NVT	NVT		2007.7	2007	E2	E2B	4y	Pd
ERR907526_G2_5_2007	ERR907526	2128336	46	46268.2	250000	94814	8	27	27	5	5	4507	PCV13	NVT		2007.7	2007	E2	E2B	6y	Ad
ERR907527_G3_23A_2007	ERR907527	2031597	18	112866	583890	344323	3	09	09	23A	23	1336	NVT	NVT		2007.7	2007	E2	E2B	2y	Pd
ERR907528_G4_6B_2006	ERR907528	2041763	28	72920.1	410933	130687	5	18	18	6C	6	2064	NVT	NVT		2006.8	2006	E2	E2A	3y	Pd
ERR907529_G4_6B_2006	ERR907529	2041482	31	65854.3	323211	123090	6	18	18	6C	6	2064	NVT	NVT		2006.8	2006	E2	E2A	12-<24m	Pd
ERR907530_G3_35F_2006	ERR907530	2056505	38	54118.6	320245	116491	6	16	16A	35F	35	498	NVT	NVT		2006.9	2006	E2	E2A	12-<24m	Pd
ERR907531_G2_35B_2007	ERR907531	2102638	51	41228.2	195479	75451	10	08	08	35B	35	452	NVT	NVT		2007.6	2007	E2	E2B	18-49y	Ad
ERR907532_G4_35A_2006	ERR907532	2089328	30	69644.3	382316	174533	4	07	07	35A	35	4505	NVT	NVT		2006.9	2006	E2	E2A	3y	Pd
ERR907533_G2_34_2007	ERR907533	2097044	28	74894.4	564161	140268	4	20	20	34	34	547	NVT	NVT		2007.7	2007	E2	E2B	18-49y	Ad
ERR907534_G3_11D_2006	ERR907534	1997093	34	58738	278628	118414	5	03	03A	11D	11	62	NVT	NVT		2006.9	2006	E2	E2A	3y	Pd
ERR907535_G4_17F_2006	ERR907535	2005853	36	55718.1	290272	148934	5	19	19B	17F	17	1794	NVT	NVT		2006.8	2006	E2	E2A	4y	Pd
ERR907536_G3_34_2007	ERR907536	2135296	39	54751.2	282960	165566	5	20	20	34	34	547	NVT	NVT		2007.7	2007	E2	E2B	3y	Pd
ERR907537_G4_6A_2006	ERR907537	2130433	38	56064	213059	89359	8	21	21	6C	6	473	NVT	NVT		2006.8	2006	E2	E2A	12-<24m	Pd
ERR907538_G4_6A_2006	ERR907538	2130989	36	59194.1	219078	99814	7	21	21	6C	6	473	NVT	NVT		2006.8	2006	E2	E2A	5y	Pd
ERR907539_G3_11D_2007	ERR907539	1993772	24	83073.8	344401	130849	5	03	03A	11D	11	62	NVT	NVT		2007.7	2007	E2	E2B	2y	Pd
ERR907540_G4_19F_2007	ERR907540	2109743	40	52743.6	280839	108272	6	27	27	19F	19	177	PCV7	VT	Portugal19F-21	2007.7	2007	E2	E2B	5y	Pd
ERR907541_G2_6A_2006	ERR907541	2128027	44	48364.2	212127	87967	8	21	21	6C	6	473	NVT	NVT		2007	2006	E2	E2A	18-49y	Ad
ERR907542_G3_19A_2007	ERR907542	2100653	36	58351.5	264881	128798	6	26	26B	19A	19	199	PCV13	NVT		2007.7	2007	E2	E2B	6-<12m	Pd
ERR907543_G2_35F_2007	ERR907543	2054389	44	46690.7	238245	87231	7	16	16A	35F	35	498	NVT	NVT		2007	2007	E2	E2B	18-49y	Ad
ERR907544_G2_34_2007	ERR907544	2132375	42	50770.8	205530	107193	7	20	20	34	34	547	NVT	NVT		2007	2007	E2	E2B	18-49y	Ad
ERR907545_G3_19F_2007	ERR907545	2110146	43	49073.2	281695	135615	5	27	27	19F	19	177	PCV7	VT	Portugal19F-21	2007.8	2007	E2	E2B	6-<12m	Pd
ERR907546_G4_15A_2006	ERR907546	2030141	50	40602.8	185618	63985	10	15	15	15A	15	817	NVT	NVT		2006.7	2006	E2	E2A	4y	Pd
ERR907547_G4_35F_2007	ERR907547	2085170	31	67263.6	342754	163807	5	16	16A	35F	35	498	NVT	NVT		2007.7	2007	E2	E2B	4y	Pd
ERR907549_G1_10A_1999	ERR907549	2101513	28	75054	346651	168375	5	16	16B	10A	10	816	NVT	NVT		1999.4	1999	E1	E1B	12-<24m	Pd
ERR907550_G1_19A_1999	ERR907550	2143203	41	52273.2	417918	137093	5	26	26B	19A	19	199	PCV13	NVT		1999.5	1999	E1	E1B	5y	Pd
ERR907551_G1_23A_2000	ERR907551	2106565	28	75234.5	582140	487459	2	09	09	23A	23	1448	NVT	NVT		2000.1	2000	E1	E1B	5y	Pd
ERR907552_G1_6A_2000	ERR907552	2097990	44	47681.6	189954	88978	8	22	22	6E	6	146	NVT	VT		2000.4	2000	E1	E1B	<6m	Pd
ERR907553_G1_15C_2000	ERR907553	2094262	32	65445.7	333285	120368	6	26	26A	15C	15	199	NVT	NVT	Netherlands15B-37	2000.4	2000	E1	E1B	12-<24m	Pd
ERR907554_G1_23F_2000	ERR907554	2114734	26	81335.9	575444	298325	3	09	09	23F	23	37	PCV7	VT	Tennessee23F-4	2000.5	2000	E1	E1B	2y	Pd
ERR907555_G1_17F_2000	ERR907555	2097288	25	83891.5	273137	133341	6	06	06B	17F	17	392	NVT	NVT		2000.3	2000	E1	E1B	12-<24m	Pd
ERR907556_G1_19F_1999	ERR907556	2097475	45	46610.6	287702	71267	7	04	04C	19F	19	654	PCV7	VT		1999.8	1999	E1	E1B	<6m	Pd
ERR907557_G1_6A_1999	ERR907557	2054932	39	52690.6	226385	123710	7	22	22	6E	6	146	NVT	VT		1999.9	1999	E1	E1B	<6m	Pd
ERR907558_G1_23F_1999	ERR907558	2075951	19	109261	376344	262534	4	09	09	23F	23	3033	PCV7	VT		1999.9	1999	E1	E1B	<6m	Pd
ERR907559_G1_6A_1999	ERR907559	2075935	27	76886.5	302357	140423	5	17	17	6A	6	395	PCV13	VT		1999.9	1999	E1	E1B	<6m	Pd
ERR907560_G1_23F_1999	ERR907560	2144427	40	53610.7	361414	102773	6	27	27	23F	23	81	PCV7	VT	Spain23F-1	1999.9	1999	E1	E1B	<6m	Pd
ERR907561_G1_6A_1999	ERR907561	2096707	31	67635.7	205213	105819	7	21	21	6C	6	473	NVT	NVT		2000	1999	E1	E1B	<6m	Pd
ERR907562_G1_23B_2000	ERR907562	2125692	30	70856.4	329735	123008	5	09	09	23B	23	1847	NVT	NVT		2000.1	2000	E1	E1B	<6m	Pd
ERR907563_G1_6A_2000	ERR907563	2072421	27	76756.3	352505	139850	5	17	17	6A	6	395	PCV13	VT		2000.4	2000	E1	E1B	<6m	Pd
ERR907564_G1_6A_1999	ERR907564	2130559	39	54629.7	194614	123067	7	17	17	6A	6	3047	PCV13	VT		1999.9	1999	E1	E1B	<6m	Pd
ERR907565_G1_10A_1999	ERR907565	2059665	53	38861.6	160526	68540	10	02	02B	10A	10	1263	NVT	NVT		2000	1999	E1	E1B	<6m	Pd
ERR907567_G1_15A_2000	ERR907567	2032115	38	53476.7	313090	66854	8	15	15	15A	15	817	NVT	NVT		2000.2	2000	E1	E1B	<6m	Pd
ERR907568_G1_23F_2000	ERR907568	2096452	46	45575	276019	71384	10	27	27	23F	23	242	PCV7	VT	Taiwan23F-15	2000.4	2000	E1	E1B	<6m	Pd
ERR907569_G1_15C_1999	ERR907569	2148429	92	23352.5	169096	72083	12	26	26A	15C	15	200	NVT	NVT		1999.8	1999	E1	E1B	<6m	Pd
ERR907570_G1_11D_1999	ERR907570	2002737	31	64604.4	344928	130972	5	03	03A	11D	11	62	NVT	NVT		1999.8	1999	E1	E1B	<6m	Pd
ERR907571_G1_11D_1999	ERR907571	2010737	32	62835.5	291261	77571	6	03	03A	11D	11	62	NVT	NVT		1999.8	1999	E1	E1B	<6m	Pd
ERR907572_G1_16F_1999	ERR907572	2102142	29	72487.7	300132	155130	5	14	14	16F	16	1840	NVT	NVT		1999.8	1999	E1	E1B	<6m	Pd
ERR907573_G1_10A_1999	ERR907573	2049625	30	68320.8	466056	111975	5	27	27	10A	10	3617	NVT	NVT		1999.9	1999	E1	E1B	<6m	Pd
ERR907574_G1_9A_1999	ERR907574	2108885	34	62026	373319	142534	5	23	23	9V	9	1269	PCV7	VT		1999.9	1999	E1	E1B	<6m	Pd
ERR907575_G1_19F_1999	ERR907575	2110322	52	40583.1	190522	75982	9	04	04C	19F	19	43	PCV7	VT		1999.9	1999	E1	E1B	<6m	Pd
ERR907576_G1_37_2000	ERR907576	1988696	21	94699.8	259566	179082	5	03	03B	37	37	1367	NVT	NVT		2000.2	2000	E1	E1B	<6m	Pd
ERR907577_G1_4_2000	ERR907577	2117555	58	36509.6	214559	77637	8	27	27	4	4	247	PCV7	VT		2000.3	2000	E1	E1B	<6m	Pd
ERR907578_G2_11D_2006	ERR907578	1997064	31	64421.4	342498	125877	4	03	03A	11D	11	62	NVT	NVT		2006.4	2006	E2	E2A	7y	Ad
ERR907579_G4_21_2006	ERR907579	2112725	45	46949.4	238349	96880	7	25	25	21	21	193	NVT	NVT	Greece21-30	2006.6	2006	E2	E2A	<6m	Pd
ERR907580_G4_NT_2007	ERR907580	2157865	64	33716.6	122712	55801	13	01	01	NT	NT	344	NVT	NVT	NorwayNT-42	2007.5	2007	E2	E2B	12-<24m	Pd
ERR907581_G4_11D_2006	ERR907581	2035256	29	70181.2	510953	167050	4	03	03A	11D	11	62	NVT	NVT		2006.4	2006	E2	E2A	5y	Pd
ERR907582_G4_21_2006	ERR907582	2110759	51	41387.4	189127	67349	9	25	25	21	21	193	NVT	NVT	Greece21-30	2006.4	2006	E2	E2A	5y	Pd
ERR907583_G4_17F_2006	ERR907583	2152222	24	89675.9	410872	134429	5	06	06B	17F	17	3075	NVT	NVT		2006.4	2006	E2	E2A	5y	Pd
ERR907584_G2_17F_2006	ERR907584	2147877	33	65087.2	312798	126951	6	06	06B	17F	17	3075	NVT	NVT		2006.5	2006	E2	E2A	18-49y	Ad
ERR907585_G3_15A_2007	ERR907585	1998905	22	90859.3	412323	169953	5	19	19A	15A	15	3058	NVT	NVT		2007.5	2007	E2	E2B	5y	Pd
ERR907586_G2_15A_2007	ERR907586	1998663	28	71380.8	460736	176549	4	19	19A	15A	15	3058	NVT	NVT		2007.5	2007	E2	E2B	18-49y	Ad
ERR907587_G4_9I_2006	ERR907587	2083339	30	69444.6	394595	202118	4	27	27	9L	9	66	NVT	NVT		2006.4	2006	E2	E2A	5y	Pd
ERR907588_G3_8_2006	ERR907588	2013689	27	74581.1	391228	144860	5	27	27	8	8	1480	NVT	NVT		2006.6	2006	E2	E2A	4y	Pd
ERR907589_G3_21_2006	ERR907589	2146084	50	42921.7	250724	73551	9	25	25	21	21	193	NVT	NVT	Greece21-30	2006.6	2006	E2	E2A	5y	Pd
ERR907590_G4_35A_2006	ERR907590	2092610	25	83704.4	444211	301401	3	07	07	35A	35	4505	NVT	NVT		2006.4	2006	E2	E2A	3y	Pd
ERR907591_G4_3_2006	ERR907591	2014797	20	100740	420835	197709	4	02	02A	3	3	180	PCV13	NVT	Netherlands3-31	2006.7	2006	E2	E2A	3y	Pd
ERR907592_G2_17F_2007	ERR907592	2006441	18	111469	378620	231649	4	19	19B	17F	17	1794	NVT	NVT		2007.5	2007	E2	E2B	7y	Ad
ERR907593_G4_19A_2006	ERR907593	2098214	42	49957.5	329255	100117	6	26	26B	19A	19	199	PCV13	NVT		2006.2	2006	E2	E2A	4y	Pd
ERR907594_G4_16F_2006	ERR907594	2083500	31	67209.7	288466	184477	5	27	27	16F	16	659	NVT	NVT		2006.2	2006	E2	E2A	2y	Pd
ERR907595_G3_19A_2006	ERR907595	2099141	41	51198.6	287418	109523	7	04	04B	19F	19	3040	PCV13	NVT		2006.3	2006	E2	E2A	<6m	Pd
ERR907596_G2_NT_2007	ERR907596	2103346	93	22616.6	153048	47613	15	01	01	NT	NT	1054	NVT	NVT		2007.2	2007	E2	E2B	18-49y	Ad
ERR907597_G3_NT_2007	ERR907597	2146449	73	29403.4	217935	57808	11	01	01	NT	NT	344	NVT	NVT	NorwayNT-42	2007.6	2007	E2	E2B	6-<12m	Pd
ERR907598_G3_21_2007	ERR907598	2111841	44	47996.4	177124	96423	8	25	25	21	21	193	NVT	NVT	Greece21-30	2007.6	2007	E2	E2B	5y	Pd
ERR907599_G4_23A_2007	ERR907599	2056216	30	68540.5	337788	132734	5	09	09	23A	23	NF	NVT	NVT		2007.3	2007	E2	E2B	<6m	Pd
ERR907600_G3_22A_2007	ERR907600	2059894	43	47904.5	242974	70019	8	13	13	22A	22	433	NVT	NVT		2007.6	2007	E2	E2B	<6m	Pd
ERR907601_G2_23B_2006	ERR907601	2124757	29	73267.5	345684	149480	5	09	09	23B	23	439	NVT	NVT		2006.4	2006	E2	E2A	7y	Ad
ERR907602_G3_23A_2006	ERR907602	2087623	42	49705.3	307204	89965	7	24	24	23A	23	338	NVT	NVT	Colombia23F-26	2006.4	2006	E2	E2A	3y	Pd
ERR907603_G2_22A_2007	ERR907603	2060521	35	58872	230365	90674	7	13	13	22A	22	433	NVT	NVT		2007.6	2007	E2	E2B	18-49y	Ad
ERR907604_G2_31_2006	ERR907604	2041674	40	51041.8	250132	116204	6	05	05	31	31	1111	NVT	NVT		2006.4	2006	E2	E2A	6y	Ad
ERR907605_G4_16F_2007	ERR907605	2149750	35	61421.4	253214	122200	7	27	27	16F	16	NF	NVT	NVT		2007.3	2007	E2	E2B	<6m	Pd
ERR907606_G4_16F_2007	ERR907606	2148494	38	56539.3	293286	124025	7	27	27	16F	16	NF	NVT	NVT		2007.3	2007	E2	E2B	12-<24m	Pd
ERR907607_G4_16F_2007	ERR907607	2146792	34	63140.9	269039	168388	5	27	27	16F	16	NF	NVT	NVT		2007.3	2007	E2	E2B	3y	Pd
ERR907608_G4_11D_2006	ERR907608	2014603	27	74614.9	377683	109358	5	03	03A	11D	11	62	NVT	NVT		2006.5	2006	E2	E2A	5y	Pd
ERR907609_G4_35B_2007	ERR907609	2099954	53	39621.8	124918	92961	10	08	08	35B	35	452	NVT	NVT		2007.6	2007	E2	E2B	3y	Pd
ERR907610_G2_35B_2007	ERR907610	2078520	48	43302.5	196553	94343	9	08	08	35B	35	452	NVT	NVT		2007.3	2007	E2	E2B	18-49y	Ad
ERR907611_G4_NT_2007	ERR907611	2152242	61	35282.7	154473	75714	10	01	01	NT	NT	344	NVT	NVT	NorwayNT-42	2007.6	2007	E2	E2B	6-<12m	Pd
ERR907612_G3_31_2007	ERR907612	2110353	45	46896.7	358372	92237	6	05	05	31	31	1111	NVT	NVT		2007.3	2007	E2	E2B	6-<12m	Pd
ERR907613_G3_11D_2007	ERR907613	2013973	32	62936.7	282546	77997	6	03	03A	11D	11	62	NVT	NVT		2007.3	2007	E2	E2B	5y	Pd
ERR907614_G3_NT_2007	ERR907614	2109489	98	21525.4	116700	47624	15	01	01	NT	NT	1054	NVT	NVT		2007.3	2007	E2	E2B	<6m	Pd
ERR907615_G2_31_2006	ERR907615	2042066	42	48620.6	322376	94584	6	05	05	31	31	1111	NVT	NVT		2006.5	2006	E2	E2A	6y	Ad
ERR907616_G4_35F_2007	ERR907616	2053706	28	73346.6	310243	126397	6	16	16A	35F	35	498	NVT	NVT		2007.6	2007	E2	E2B	6-<12m	Pd
ERR907617_G3_22A_2007	ERR907617	2093964	39	53691.4	272446	86780	9	13	13	22A	22	433	NVT	NVT		2007.3	2007	E2	E2B	4y	Pd
ERR907618_G2_22A_2007	ERR907618	2093495	40	52337.4	227038	91747	9	13	13	22A	22	433	NVT	NVT		2007.3	2007	E2	E2B	6y	Ad
ERR907619_G4_17F_2007	ERR907619	2005680	23	87203.5	375762	231816	4	19	19B	17F	17	1794	NVT	NVT		2007.3	2007	E2	E2B	6-<12m	Pd
ERR907620_G2_10B_2007	ERR907620	2040168	35	58290.5	262425	101520	7	16	16B	10B	10	816	NVT	NVT		2007.3	2007	E2	E2B	7y	Ad
ERR907621_G3_23B_2007	ERR907621	2121669	35	60619.1	328661	124256	6	09	09	23B	23	439	NVT	NVT		2007.3	2007	E2	E2B	3y	Pd
ERR907622_G4_35F_2007	ERR907622	2084775	23	90642.4	343796	143674	4	16	16A	35F	35	498	NVT	NVT		2007.3	2007	E2	E2B	4y	Pd
ERR907623_G2_23A_2006	ERR907623	2049899	24	85412.5	338010	202290	5	09	09	23A	23	438	NVT	NVT		2006.6	2006	E2	E2A	18-49y	Ad
ERR907624_G4_35F_2007	ERR907624	2085931	29	71928.7	337407	126891	6	16	16A	35F	35	498	NVT	NVT		2007.4	2007	E2	E2B	3y	Pd
ERR907625_G3_35A_2006	ERR907625	2041677	22	92803.5	497445	193197	4	07	07	35A	35	4518	NVT	NVT		2006.6	2006	E2	E2A	12-<24m	Pd
ERR907626_G4_23B_2007	ERR907626	2160300	57	37900	487692	124539	5	09	09	23B	23	439	NVT	NVT		2007.4	2007	E2	E2B	<6m	Pd
ERR907627_G2_15A_2006	ERR907627	2030878	45	45130.6	185633	68540	9	15	15	15A	15	817	NVT	NVT		2006.6	2006	E2	E2A	6y	Ad
ERR907628_G4_22A_2007	ERR907628	2093103	38	55081.7	347416	92078	7	13	13	22A	22	4527	NVT	NVT		2007.4	2007	E2	E2B	12-<24m	Pd
ERR907629_G4_19F_2007	ERR907629	2090842	49	42670.2	175110	77621	10	04	04C	19F	19	251	PCV7	VT		2007.4	2007	E2	E2B	2y	Pd
ERR907630_G2_22A_2007	ERR907630	2126662	43	49457.3	204234	68657	9	13	13	22A	22	433	NVT	NVT		2007.4	2007	E2	E2B	6y	Ad
ERR907631_G4_19F_2007	ERR907631	2090924	48	43560.9	175114	94208	8	04	04C	19F	19	251	PCV7	VT		2007.4	2007	E2	E2B	5y	Pd
ERR907632_G4_17F_2007	ERR907632	2007430	23	87279.6	297287	149510	5	19	19B	17F	17	1794	NVT	NVT		2007.4	2007	E2	E2B	6-<12m	Pd
ERR907633_G4_19A_2006	ERR907633	2097410	42	49938.3	253591	85555	9	04	04B	19F	19	3040	PCV13	NVT		2006.8	2006	E2	E2A	5y	Pd
ERR907634_G3_7B_2007	ERR907634	2156893	40	53922.3	383112	196431	4	26	26A	7B	7	1757	NVT	NVT		2007.7	2007	E2	E2B	<6m	Pd
ERR907635_G2_7B_2007	ERR907635	2156936	40	53923.4	293844	170153	5	26	26A	7B	7	1757	NVT	NVT		2007.7	2007	E2	E2B	18-49y	Ad
ERR907636_G2_22A_2007	ERR907636	2057841	32	64307.5	217433	99344	7	13	13	22A	22	433	NVT	NVT		2007.7	2007	E2	E2B	18-49y	Ad
ERR907637_G3_9A_2007	ERR907637	2106406	42	50152.5	245735	85405	8	23	23	9V	9	1269	PCV7	VT		2007.7	2007	E2	E2B	4y	Pd
ERR907638_G3_12B_2007	ERR907638	1971497	27	73018.4	195176	126576	7	27	27	12B	12	220	NVT	NVT	Denmark12F-24	2007.7	2007	E2	E2B	2y	Pd
ERR907639_G2_19A_2007	ERR907639	2103942	35	60112.6	423087	126623	5	26	26B	19A	19	199	PCV13	NVT		2007.7	2007	E2	E2B	18-49y	Ad
ERR907640_G4_21_2006	ERR907640	2107834	46	45822.5	307000	91720	6	25	25	21	21	193	NVT	NVT	Greece21-30	2006.9	2006	E2	E2A	6-<12m	Pd
ERR907641_G4_23B_2006	ERR907641	2122851	25	84914	345103	179981	5	09	09	23B	23	439	NVT	NVT		2006.9	2006	E2	E2A	4y	Pd
ERR907642_G3_22A_2007	ERR907642	2059326	39	52803.2	179423	104616	8	13	13	22A	22	433	NVT	NVT		2007.7	2007	E2	E2B	12-<24m	Pd
ERR907643_G3_34_2006	ERR907643	2085662	21	99317.2	540846	273486	3	20	20	34	34	547	NVT	NVT		2006.9	2006	E2	E2A	3y	Pd
ERR907644_G3_19A_2006	ERR907644	2046997	34	60205.8	675947	126155	4	10	10	19A	19	NF	PCV13	NVT		2006.9	2006	E2	E2A	2y	Pd
ERR907645_G3_21_2006	ERR907645	2109999	41	51463.4	341505	96482	7	25	25	21	21	193	NVT	NVT	Greece21-30	2006.9	2006	E2	E2A	12-<24m	Pd
ERR907646_G2_10A_2006	ERR907646	2058256	39	52775.8	315194	89512	6	02	02B	10A	10	1263*	NVT	NVT		2006.9	2006	E2	E2A	18-49y	Ad
ERR907647_G3_6A_2007	ERR907647	2142801	45	47617.8	283657	72104	8	21	21	6C	6	473	NVT	NVT		2007.7	2007	E2	E2B	2y	Pd
ERR907648_G3_15A_2006	ERR907648	2029456	49	41417.5	137337	66864	11	15	15	15A	15	817	NVT	NVT		2007	2006	E2	E2A	2y	Pd
ERR907649_G3_15A_2006	ERR907649	2031829	39	52098.2	312694	114429	6	15	15	15A	15	817	NVT	NVT		2007	2006	E2	E2A	5y	Pd
ERR907650_G2_35B_2006	ERR907650	2100021	44	47727.8	124666	85911	10	08	08	35B	35	452	NVT	NVT		2007	2006	E2	E2A	18-49y	Ad
ERR907651_G4_15C_2007	ERR907651	2166402	47	46093.7	306821	130960	5	26	26A	15C	15	199	NVT	NVT	Netherlands15B-37	2007.5	2007	E2	E2B	5y	Pd
ERR907652_G4_11D_2006	ERR907652	2043497	38	53776.2	346404	100802	6	03	03A	11D	11	62	NVT	NVT		2007	2006	E2	E2A	4y	Pd
ERR907653_G2_37_2007	ERR907653	2044280	11	185844	1133146	1133146	1	03	03B	37	37	100	NVT	NVT		2007	2007	E2	E2B	18-49y	Ad
ERR907654_G2_21_2007	ERR907654	2151560	45	47812.4	189776	83809	9	25	25	21	21	193	NVT	NVT	Greece21-30	2007.8	2007	E2	E2B	18-49y	Ad
ERR907655_G2_22A_2006	ERR907655	2060082	36	57224.5	223719	99193	6	13	13	22A	22	433	NVT	NVT		2006.7	2006	E2	E2A	7y	Ad
ERR907656_G3_35B_2007	ERR907656	2104203	47	44770.3	177786	69346	10	08	08	35B	35	452	NVT	NVT		2007.8	2007	E2	E2B	2y	Pd
ERR907657_G2_17F_2007	ERR907657	2004070	22	91094.1	442203	177878	4	19	19B	17F	17	1794	NVT	NVT		2007.8	2007	E2	E2B	18-49y	Ad
ERR907658_G2_12A_2006	ERR907658	1997273	29	68871.5	589091	155689	4	27	27	12A	12	218	NVT	NVT	Denmark12F-24	2006.8	2006	E2	E2A	18-49y	Ad
ERR907659_G2_1_2006	ERR907659	2095559	52	40299.2	153566	78274	9	27	27	1	1	227	PCV13	NVT		2006.8	2006	E2	E2A	18-49y	Ad
ERR907660_G2_16F_2007	ERR907660	2150017	29	74138.5	294096	147225	6	27	27	16F	16	NF	NVT	NVT		2007.8	2007	E2	E2B	6y	Ad
ERR907661_G3_22A_2007	ERR907661	2049684	27	75914.2	273844	119415	6	13	13	22A	22	433	NVT	NVT		2007.8	2007	E2	E2B	2y	Pd
ERR907662_G3_15A_2007	ERR907662	2052092	45	45602	184018	86277	10	15	15	15A	15	817	NVT	NVT		2007.6	2007	E2	E2B	<6m	Pd
ERR907663_G3_15A_2007	ERR907663	2051674	44	46628.9	183990	89131	9	15	15	15A	15	817	NVT	NVT		2007.6	2007	E2	E2B	3y	Pd
ERR907664_G2_19F_2007	ERR907664	2097284	43	48774.1	336146	85970	6	04	04C	19F	19	654	PCV7	VT		2007.8	2007	E2	E2B	6y	Ad
ERR907665_G3_10B_2007	ERR907665	2060435	36	57234.3	307762	151873	5	16	16B	10B	10	816	NVT	NVT		2007.6	2007	E2	E2B	5y	Pd
ERR907666_G2_23B_2006	ERR907666	2126886	28	75960.2	325866	179811	5	09	09	23B	23	439	NVT	NVT		2006.9	2006	E2	E2A	18-49y	Ad
ERR907667_G4_10F_2007	ERR907667	2072499	34	60955.8	233076	104982	7	27	27	10F	10	32	NVT	NVT		2007.4	2007	E2	E2B	12-<24m	Pd
ERR907668_G3_11D_2007	ERR907668	1997803	28	71350.1	346654	123523	4	03	03A	11D	11	62	NVT	NVT		2007.4	2007	E2	E2B	12-<24m	Pd
ERR907669_G2_16F_2006	ERR907669	2110797	25	84431.9	391360	203348	4	14	14	16F	16	1840	NVT	NVT		2006.9	2006	E2	E2A	18-49y	Ad
ERR907670_G2_16F_2007	ERR907670	2112879	32	66027.5	304067	128577	6	14	14	16F	16	1840	NVT	NVT		2007.4	2007	E2	E2B	18-49y	Ad
ERR907671_G3_15A_2006	ERR907671	2036492	25	81459.7	461210	140809	5	19	19A	15A	15	3058	NVT	NVT		2007	2006	E2	E2A	2y	Pd
ERR907672_G2_19A_2006	ERR907672	2053953	26	78998.2	387056	201335	4	26	26B	19A	19	199	PCV13	NVT		2007	2006	E2	E2A	18-49y	Ad
ERR907673_G4_33A_2007	ERR907673	2043116	17	120183	378146	246265	4	03	03A	33A	33	100	NVT	NVT		2007.5	2007	E2	E2B	6-<12m	Pd
ERR907674_G4_7C_2007	ERR907674	2070615	47	44055.6	190172	64416	9	04	04A	7C	7	1797	NVT	NVT		2007.5	2007	E2	E2B	5y	Pd
ERR907675_G3_22A_2006	ERR907675	2057773	30	68592.4	295933	145793	5	13	13	22A	22	433	NVT	NVT		2007	2006	E2	E2A	4y	Pd
ERR907676_G4_6B_2007	ERR907676	2096922	32	65528.8	315861	148715	5	18	18	6C	6	1390	NVT	NVT		2007.5	2007	E2	E2B	2y	Pd
ERR907677_G2_1_2007	ERR907677	2090907	58	36050.1	132887	54835	12	27	27	1	1	227	PCV13	NVT		2007	2007	E2	E2B	18-49y	Ad
ERR907678_G4_35A_2007	ERR907678	2040949	22	92770.4	393004	242652	4	07	07	35A	35	4518	NVT	NVT		2007.4	2007	E2	E2B	3y	Pd
ERR907679_G4_11D_2007	ERR907679	2035851	25	81434	345618	167676	4	03	03A	11D	11	62	NVT	NVT		2007.5	2007	E2	E2B	2y	Pd
ERR907680_G4_35B_2007	ERR907680	2000112	26	76927.4	311576	107790	6	11	11	35B	35	558	NVT	NVT		2007.5	2007	E2	E2B	6-<12m	Pd
ERR907681_G3_34_2007	ERR907681	2083952	27	77183.4	338264	184609	4	20	20	34	34	547	NVT	NVT		2007	2007	E2	E2B	3y	Pd
ERR907682_G2_22A_2007	ERR907682	2056926	28	73461.6	613856	99352	5	13	13	22A	22	433	NVT	NVT		2007	2007	E2	E2B	18-49y	Ad
ERR907683_G4_38_2007	ERR907683	2120495	67	31649.2	176900	53919	11	27	27	38	38	393	NVT	NVT		2007.5	2007	E2	E2B	3y	Pd
ERR907684_G4_31_2007	ERR907684	2007409	48	41821	166458	67546	9	05	05	31	31	568	NVT	NVT		2007.5	2007	E2	E2B	5y	Pd
ERR907685_G3_21_2007	ERR907685	2112218	45	46938.2	178721	96878	9	25	25	21	21	193	NVT	NVT	Greece21-30	2007.5	2007	E2	E2B	12-<24m	Pd
ERR907686_G2_23A_2007	ERR907686	2138312	32	66822.2	480232	147213	5	24	24	23A	23	338	NVT	NVT	Colombia23F-26	2007.5	2007	E2	E2B	6y	Ad
ERR907687_G4_21_2007	ERR907687	2113605	41	51551.3	318279	106118	7	25	25	21	21	193	NVT	NVT	Greece21-30	2007.5	2007	E2	E2B	2y	Pd
ERR907688_G4_3_2006	ERR907688	1967359	24	81973.3	365088	116274	5	02	02A	3	3	180	PCV13	NVT	Netherlands3-31	2006.9	2006	E2	E2A	3y	Pd
ERR907689_G4_3_2006	ERR907689	1969105	31	63519.5	192929	116409	7	02	02A	3	3	180	PCV13	NVT	Netherlands3-31	2006.9	2006	E2	E2A	12-<24m	Pd
ERR907690_G3_6A_2006	ERR907690	2054300	41	50104.9	279904	105589	7	22	22	6C	6	385	NVT	NVT		2006.9	2006	E2	E2A	2y	Pd
ERR907691_G4_NT_2007	ERR907691	2174194	71	30622.5	203022	65151	10	01	01	NT	NT	344	NVT	NVT	NorwayNT-42	2007.5	2007	E2	E2B	6-<12m	Pd
ERR907692_G4_NT_2007	ERR907692	2172878	74	29363.2	185710	49458	13	01	01	NT	NT	344	NVT	NVT	NorwayNT-42	2007.5	2007	E2	E2B	4y	Pd
ERR907693_G3_23A_2006	ERR907693	2085263	37	56358.5	217003	115297	7	24	24	23A	23	338	NVT	NVT	Colombia23F-26	2007	2006	E2	E2A	2y	Pd
ERR907694_G2_11D_2007	ERR907694	1996864	33	60511	300798	123284	5	03	03A	11D	11	62	NVT	NVT		2007.5	2007	E2	E2B	18-49y	Ad
ERR907695_G2_19A_2007	ERR907695	2059787	38	54204.9	327159	92372	6	26	26B	19A	19	199	PCV13	NVT		2007.5	2007	E2	E2B	18-49y	Ad
ERR907696_G3_21_2007	ERR907696	2109061	45	46868	303024	106280	7	25	25	21	21	193	NVT	NVT	Greece21-30	2007.5	2007	E2	E2B	2y	Pd
ERR907697_G3_19A_2007	ERR907697	2137431	39	54805.9	330901	164583	5	26	26B	19A	19	667	PCV13	NVT		2007.5	2007	E2	E2B	<6m	Pd
ERR907698_G4_22A_2007	ERR907698	2059138	35	58832.5	260990	92750	7	13	13	22A	22	433	NVT	NVT		2007	2007	E2	E2B	3y	Pd
ERR907699_G4_22F_2007	ERR907699	2078561	31	67050.4	330590	129576	6	20	20	22F	22	4522	NVT	NVT		2007	2007	E2	E2B	3y	Pd
ERR907700_G3_31_2007	ERR907700	2008153	43	46701.2	275861	80319	7	05	05	31	31	568	NVT	NVT		2007.5	2007	E2	E2B	12-<24m	Pd
ERR907701_G2_6A_2007	ERR907701	2117190	43	49237	237864	87476	8	21	21	6C	6	473	NVT	NVT		2007.6	2007	E2	E2B	7y	Ad
ERR907702_G3_23A_2007	ERR907702	2101893	38	55313	304470	116494	6	24	24	23A	23	338	NVT	NVT	Colombia23F-26	2007.6	2007	E2	E2B	5y	Pd
ERR907703_G2_12B_2007	ERR907703	1995685	26	76757.1	426554	155785	4	27	27	12B	12	218	NVT	NVT	Denmark12F-24	2007.6	2007	E2	E2B	18-49y	Ad
ERR907704_G2_19A_2007	ERR907704	2112676	44	48015.4	254830	119132	7	26	26B	19A	19	199	PCV13	NVT		2007.1	2007	E2	E2B	18-49y	Ad
ERR907705_G4_6B_2007	ERR907705	2042841	19	107518	566014	205426	4	18	18	6C	6	2064	NVT	NVT		2007.6	2007	E2	E2B	2y	Pd
ERR907706_G2_11D_2007	ERR907706	2010544	42	47870.1	279916	97912	7	03	03A	11D	11	62	NVT	NVT		2007.1	2007	E2	E2B	11-17y	Pd
ERR907707_G2_17F_2007	ERR907707	2008454	26	77248.2	415908	172393	4	19	19B	17F	17	1794	NVT	NVT		2007.1	2007	E2	E2B	6y	Ad
ERR907708_G3_11D_2007	ERR907708	1996322	31	64397.5	300090	125372	5	03	03A	11D	11	62	NVT	NVT		2007.6	2007	E2	E2B	<6m	Pd
ERR907709_G4_23A_2007	ERR907709	2094376	40	52359.4	290621	128187	6	24	24	23A	23	338	NVT	NVT	Colombia23F-26	2007.1	2007	E2	E2B	12-<24m	Pd
ERR907710_G4_23A_2007	ERR907710	2095012	35	59857.5	216804	103741	7	24	24	23A	23	338	NVT	NVT	Colombia23F-26	2007.1	2007	E2	E2B	<6m	Pd
ERR907711_G2_16F_2007	ERR907711	2073149	43	48212.8	233411	83384	9	27	27	16F	16	3157	NVT	NVT		2007.6	2007	E2	E2B	6y	Ad
ERR907712_G2_6B_2007	ERR907712	2066517	26	79481.4	324285	110359	6	21	21	6A	6	473	PCV13	VT		2007.2	2007	E2	E2B	18-49y	Ad
ERR907713_G3_19A_2007	ERR907713	2073532	41	50573.9	261579	132438	6	26	26B	19A	19	199	PCV13	NVT		2007.7	2007	E2	E2B	3y	Pd
ERR907714_G2_10A_2007	ERR907714	2058254	32	64320.4	303139	146326	5	16	16B	10A	10	816	NVT	NVT		2007.2	2007	E2	E2B	6y	Ad
ERR907715_G3_35B_2007	ERR907715	2087397	38	54931.5	491910	137736	4	23	23	35B	15	162	NVT	NVT		2007.1	2007	E2	E2B	3y	Pd
ERR907716_G3_22A_2007	ERR907716	2057480	31	66370.3	405500	111737	6	13	13	22A	22	433	NVT	NVT		2007.1	2007	E2	E2B	4y	Pd
ERR907717_G4_23A_2007	ERR907717	2092829	32	65400.9	290679	114936	5	24	24	23A	23	338	NVT	NVT	Colombia23F-26	2007.2	2007	E2	E2B	6-<12m	Pd
ERR907718_G2_17F_2007	ERR907718	2009690	23	87377.8	417371	297017	3	19	19B	17F	17	1794	NVT	NVT		2007.2	2007	E2	E2B	18-49y	Ad
ERR907719_G2_6A_2007	ERR907719	2130397	46	46313	209211	88014	9	21	21	6C	6	473	NVT	NVT		2007.8	2007	E2	E2B	8y	Ad
ERR907720_G3_11D_2007	ERR907720	2010730	39	51557.2	342535	122326	6	03	03A	11D	11	62	NVT	NVT		2007.2	2007	E2	E2B	<6m	Pd
ERR907721_G2_23B_2007	ERR907721	2080013	29	71724.6	581001	228866	3	09	09	23B	23	1448	NVT	NVT		2007.2	2007	E2	E2B	18-49y	Ad
ERR907722_G3_22A_2007	ERR907722	2093048	36	58140.2	203932	93721	8	13	13	22A	22	4527	NVT	NVT		2007.9	2007	E2	E2B	2y	Pd
ERR907723_G4_19A_2007	ERR907723	2098133	32	65566.7	383843	164648	4	26	26B	19A	19	199	PCV13	NVT		2007.2	2007	E2	E2B	12-<24m	Pd
ERR907724_G3_12A_2007	ERR907724	1993413	31	64303.7	424037	146852	5	27	27	12A	12	218	NVT	NVT	Denmark12F-24	2007.2	2007	E2	E2B	4y	Pd
ERR907725_G2_15C_2007	ERR907725	2052387	30	68412.9	277021	119924	6	26	26A	15C	15	199	NVT	NVT	Netherlands15B-37	2007.9	2007	E2	E2B	18-49y	Ad
ERR907726_G2_11D_2007	ERR907726	1997373	26	76822	342451	132462	4	03	03A	11D	11	62	NVT	NVT		2007.2	2007	E2	E2B	6y	Ad
ERR907727_G3_6B_2007	ERR907727	2098853	42	49972.7	296630	109300	7	18	18	6C	6	1390	NVT	NVT		2007.2	2007	E2	E2B	6-<12m	Pd
ERR907728_G3_15A_2007	ERR907728	2108220	49	43024.9	194522	76395	9	15	15	15A	15	817	NVT	NVT		2007.2	2007	E2	E2B	4y	Pd
ERR907729_G2_6B_2007	ERR907729	2097462	35	59927.5	295949	122238	6	18	18	6C	6	1390	NVT	NVT		2007.2	2007	E2	E2B	18-49y	Ad
ERR907730_G4_16F_2007	ERR907730	2146746	37	58020.2	392297	150762	6	14	14	16F	16	1840	NVT	NVT		2007.2	2007	E2	E2B	<6m	Pd
ERR907731_G4_23A_2007	ERR907731	2122773	38	55862.4	306908	114846	6	24	24	23A	23	338	NVT	NVT	Colombia23F-26	2007.3	2007	E2	E2B	6-<12m	Pd
ERR907732_G3_11D_2007	ERR907732	1998379	30	66612.6	280036	89810	6	03	03A	11D	11	62*	NVT	NVT		2007.3	2007	E2	E2B	12-<24m	Pd
ERR907733_G3_22F_2007	ERR907733	2077385	28	74192.3	502012	144678	4	20	20	22F	22	4522	NVT	NVT		2007.3	2007	E2	E2B	4y	Pd
ERR907734_G4_23A_2007	ERR907734	2031551	18	112864	590093	583152	2	09	09	23A	23	1336	NVT	NVT		2007.3	2007	E2	E2B	<6m	Pd
ERR907735_G3_15A_2007	ERR907735	2048045	50	40960.9	184432	66360	11	15	15	15A	15	817	NVT	NVT		2007.3	2007	E2	E2B	4y	Pd
ERR907736_G2_34_2007	ERR907736	2087678	25	83507.1	574580	258662	3	20	20	34	34	547	NVT	NVT		2007.3	2007	E2	E2B	18-49y	Ad
ERR907737_G2_23B_2007	ERR907737	2125703	32	66428.2	453755	125097	5	09	09	23B	23	439	NVT	NVT		2007.2	2007	E2	E2B	18-49y	Ad
ERR907738_G3_23B_2007	ERR907738	2085120	35	59574.9	264872	123016	6	09	09	23B	23	1847	NVT	NVT		2007.3	2007	E2	E2B	6-<12m	Pd
ERR907739_G2_31_2007	ERR907739	2013599	49	41093.9	191611	65357	11	05	05	31	31	568	NVT	NVT		2007.3	2007	E2	E2B	6y	Ad
ERR907740_G2_23B_2007	ERR907740	2126874	33	64450.7	307646	196860	5	09	09	23B	23	439	NVT	NVT		2007.3	2007	E2	E2B	6y	Ad
ERR907741_G3_35F_2007	ERR907741	2019761	25	80790.4	278146	169496	5	06	06A	35F	35	487	NVT	NVT		2007.3	2007	E2	E2B	3y	Pd
ERR907742_G3_34_2007	ERR907742	2083420	20	104171	659937	387390	2	20	20	34	34	547	NVT	NVT		2007.3	2007	E2	E2B	12-<24m	Pd
ERR907743_G3_6A_2007	ERR907743	2116469	43	49220.2	212505	88528	8	21	21	6C	6	473	NVT	NVT		2007.3	2007	E2	E2B	4y	Pd
ERR907744_G3_35F_2007	ERR907744	2020796	33	61236.2	388397	118533	6	06	06A	35F	35	487	NVT	NVT		2007.9	2007	E2	E2B	<6m	Pd
ERR907745_G2_19A_2007	ERR907745	2106022	34	61941.8	269528	123970	6	26	26B	19A	19	199	PCV13	NVT		2007.3	2007	E2	E2B	65+y	Ad
ERR907746_G3_19F_2007	ERR907746	2056899	49	41977.5	232514	78845	8	04	04C	19F	19	251	PCV7	VT		2007.9	2007	E2	E2B	<6m	Pd
ERR907747_G3_35B_2007	ERR907747	2139405	51	41949.1	161825	97617	9	08	08	35B	35	452	NVT	NVT		2007.3	2007	E2	E2B	12-<24m	Pd
ERR907748_G3_15A_2007	ERR907748	2086537	48	43469.5	204174	86198	9	15	15	15A	15	817	NVT	NVT		2007.3	2007	E2	E2B	12-<24m	Pd
ERR907749_G3_15A_2007	ERR907749	2088470	48	43509.8	204429	84456	9	15	15	15A	15	817	NVT	NVT		2007.3	2007	E2	E2B	5y	Pd
ERR907750_G3_37_2007	ERR907750	2061949	17	121291	452056	262817	3	03	03B	37	37	2705	NVT	NVT		2007.3	2007	E2	E2B	<6m	Pd
ERR907751_G3_7A_2007	ERR907751	1992130	45	44269.6	227072	76264	8	27	27	7A	7	191	NVT	NVT	Netherlands7F-39	2008	2007	E2	E2B	<6m	Pd
ERR907752_G2_15A_2007	ERR907752	2046465	58	35283.9	184316	63936	11	15	15	15A	15	817	NVT	NVT		2007.3	2007	E2	E2B	18-49y	Ad
ERR907753_G3_NT_2007	ERR907753	2079479	40	51987	312040	95484	7	01	01	NT	NT	1186	NVT	NVT		2007.3	2007	E2	E2B	2y	Pd
ERR907754_G2_NT_2007	ERR907754	2142859	45	47619.1	312020	91892	7	01	01	NT	NT	1186	NVT	NVT		2007.3	2007	E2	E2B	18-49y	Ad
ERR907755_G2_15B_2007	ERR907755	2090347	33	63343.8	427166	119042	5	26	26A	15B	15	199	NVT	NVT	Netherlands15B-37	2007.3	2007	E2	E2B	6y	Ad
ERR907756_G4_34_2007	ERR907756	2082429	31	67175.1	341293	146563	5	20	20	34	34	547	NVT	NVT		2007.3	2007	E2	E2B	3y	Pd
ERR907757_G4_6B_2007	ERR907757	2064246	28	73723.1	508583	125014	5	18	18	6C	6	3101	NVT	NVT		2007.3	2007	E2	E2B	12-<24m	Pd
ERR907758_G3_23B_2007	ERR907758	2125295	28	75903.4	352933	190243	4	09	09	23B	23	439	NVT	NVT		2007.3	2007	E2	E2B	2y	Pd
ERR907759_G3_35B_2007	ERR907759	2000934	32	62529.2	308246	94029	6	11	11	35B	35	558	NVT	NVT		2007.3	2007	E2	E2B	<6m	Pd
ERR907760_G3_19A_2007	ERR907760	2086380	39	53496.9	397517	109432	6	10	10	19A	19	320	PCV13	NVT		2007.3	2007	E2	E2B	<6m	Pd
ERR907761_G3_35B_2007	ERR907761	2001492	28	71481.9	210523	106681	7	11	11	35B	35	558	NVT	NVT		2007.3	2007	E2	E2B	6-<12m	Pd
ERR907762_G3_19A_2007	ERR907762	2077188	44	47208.8	340653	75040	7	10	10	19A	19	320	PCV13	NVT		2007.3	2007	E2	E2B	4y	Pd
ERR907763_G3_23B_2007	ERR907763	2127815	26	81839	346178	190066	4	09	09	23B	23	439	NVT	NVT		2007.3	2007	E2	E2B	2y	Pd
ERR907764_G3_16F_2007	ERR907764	2141094	42	50978.4	211476	125865	7	14	14	16F	16	1840	NVT	NVT		2007.3	2007	E2	E2B	2y	Pd
ERR907765_G2_35B_2007	ERR907765	2101599	48	43783.3	195527	75594	10	08	08	35B	35	452	NVT	NVT		2007.4	2007	E2	E2B	7y	Ad
ERR907766_G3_35B_2007	ERR907766	2079833	40	51995.8	265490	104167	8	08	08	35B	35	452	NVT	NVT		2007.4	2007	E2	E2B	3y	Pd
ERR907767_G3_31_2007	ERR907767	2015031	50	40300.6	148327	65360	11	05	05	31	31	568	NVT	NVT		2007.4	2007	E2	E2B	2y	Pd
ERR907768_G3_35F_2007	ERR907768	2020044	34	59413.1	237699	89433	7	06	06A	35F	35	487	NVT	NVT		2007.4	2007	E2	E2B	<6m	Pd
ERR907769_G3_35B_2007	ERR907769	2000393	31	64528.8	258042	93811	7	11	11	35B	35	558	NVT	NVT		2007.4	2007	E2	E2B	6-<12m	Pd
ERR907770_G4_11D_2007	ERR907770	1996479	31	64402.6	269507	85780	6	03	03A	11D	11	62*	NVT	NVT		2007.4	2007	E2	E2B	4y	Pd
ERR907771_G3_22A_2007	ERR907771	2057499	30	68583.3	225109	133230	6	13	13	22A	22	433	NVT	NVT		2007.4	2007	E2	E2B	<6m	Pd
ERR907772_G2_19A_2007	ERR907772	2101745	36	58381.8	322005	130712	5	26	26B	19A	19	199	PCV13	NVT		2007.1	2007	E2	E2B	18-49y	Ad
ERR907773_G4_19A_2007	ERR907773	2150930	50	43018.6	256321	69956	8	26	26B	19A	19	1756	PCV13	NVT		2007.4	2007	E2	E2B	<6m	Pd
ERR907774_G2_9I_2007	ERR907774	2087533	24	86980.5	503974	184829	4	27	27	9L	9	66	NVT	NVT		2007.1	2007	E2	E2B	18-49y	Ad
ERR907775_G2_7B_2007	ERR907775	2129069	33	64517.2	264541	163979	5	26	26A	7B	7	1757	NVT	NVT		2007.4	2007	E2	E2B	65+y	Ad
ERR907776_G4_16F_2007	ERR907776	2109843	26	81147.8	249694	160887	5	14	14	16F	16	1840	NVT	NVT		2007.1	2007	E2	E2B	4y	Pd
ERR907777_G4_6B_2007	ERR907777	2040966	27	75591.3	238481	127490	6	18	18	6C	6	2064	NVT	NVT		2007.1	2007	E2	E2B	3y	Pd
ERR907778_G4_15C_2007	ERR907778	2146291	35	61322.6	393918	118264	6	26	26A	15C	15	199	NVT	NVT	Netherlands15B-37	2007.4	2007	E2	E2B	3y	Pd
ERR907779_G2_15A_2008	ERR907779	2092140	26	80466.9	517957	109801	5	21	21	15A		4526	NVT	NVT		2008	2008	E2	E2B	18-49y	Ad
ERR907780_G3_6B_2007	ERR907780	2041324	19	107438	541406	163083	4	18	18	6C	6	2064	NVT	NVT		2007.2	2007	E2	E2B	<6m	Pd
ERR907781_G2_10F_2008	ERR907781	2071848	27	76735.1	420373	181835	5	27	27	10F	10	32	NVT	NVT		2008	2008	E2	E2B	18-49y	Ad
ERR907782_G2_6B_2007	ERR907782	2039947	23	88693.4	359071	123066	6	18	18	6C	6	2064	NVT	NVT		2007.2	2007	E2	E2B	18-49y	Ad
ERR907783_G3_17F_2007	ERR907783	2006888	20	100344	419991	177385	4	19	19B	17F	17	1794	NVT	NVT		2007.5	2007	E2	E2B	6-<12m	Pd
ERR907784_G3_15C_2007	ERR907784	2059998	33	62424.2	330027	133883	5	27	27	15C	15	NF	NVT	NVT		2007.5	2007	E2	E2B	6-<12m	Pd
ERR907785_G2_35F_2007	ERR907785	2058260	39	52775.9	331318	144429	5	16	16A	35F	35	498	NVT	NVT		2007.2	2007	E2	E2B	18-49y	Ad
ERR907786_G2_3_2007	ERR907786	1986323	28	70940.1	301892	137125	5	02	02A	3	3	1119	PCV13	NVT		2007.9	2007	E2	E2B	18-49y	Ad
ERR907787_G2_22A_2007	ERR907787	2126408	46	46226.3	261074	109067	7	13	13	22A	22	433	NVT	NVT		2007.9	2007	E2	E2B	6y	Ad
ERR907788_G3_19A_2007	ERR907788	2141057	38	56343.6	385597	130367	5	26	26B	19A	19	199	PCV13	NVT		2007.9	2007	E2	E2B	12-<24m	Pd
ERR907789_G2_19A_2007	ERR907789	2138140	48	44544.6	264600	142413	6	26	26B	19A	19	667	PCV13	NVT		2007.2	2007	E2	E2B	18-49y	Ad
ERR907790_G3_23B_2007	ERR907790	2124740	31	68540	390008	177628	4	24	24	23B	23	1373	NVT	NVT		2007.9	2007	E2	E2B	6-<12m	Pd
ERR907791_G4_6B_2007	ERR907791	2044996	32	63906.1	281191	125562	5	18	18	6C	6	2064	NVT	NVT		2007.2	2007	E2	E2B	3y	Pd
ERR907792_G4_6B_2007	ERR907792	2042904	28	72960.9	280901	152209	5	18	18	6C	6	2064	NVT	NVT		2007.2	2007	E2	E2B	5y	Pd
ERR907793_G2_34_2007	ERR907793	2081781	27	77103	356850	194707	4	20	20	34	34	547	NVT	NVT		2007.5	2007	E2	E2B	18-49y	Ad
ERR907794_G3_16F_2007	ERR907794	2141680	49	43707.8	248285	129100	6	14	14	16F	16	1840	NVT	NVT		2007.5	2007	E2	E2B	4y	Pd
ERR907795_G3_22A_2008	ERR907795	2059299	37	55656.7	352660	119668	6	13	13	22A	22	433	NVT	NVT		2008.2	2008	E2	E2B	<6m	Pd
ERR907796_G2_37_2007	ERR907796	2006173	41	48931.1	287489	76560	8	27	27	37	37	447	NVT	NVT		2007.7	2007	E2	E2B	7y	Ad
ERR907797_G2_23B_2007	ERR907797	2125249	38	55927.6	332708	132207	6	24	24	23B	23	1373	NVT	NVT		2007.7	2007	E2	E2B	6y	Ad
ERR907798_G4_34_2007	ERR907798	2139939	37	57836.2	279808	204241	5	20	20	34	34	547	NVT	NVT		2007.3	2007	E2	E2B	6-<12m	Pd
ERR907799_G3_37_2007	ERR907799	2060674	22	93667	378139	257373	4	03	03B	37	37	2705	NVT	NVT		2007.5	2007	E2	E2B	<6m	Pd
ERR907800_G3_6B_2007	ERR907800	2044874	26	78649	406658	125503	5	18	18	6C	6	2064	NVT	NVT		2007.3	2007	E2	E2B	12-<24m	Pd
ERR907801_G3_34_2007	ERR907801	2136328	35	61037.9	351753	243289	4	20	20	34	34	547	NVT	NVT		2007.3	2007	E2	E2B	2y	Pd
ERR907802_G4_19A_2007	ERR907802	2138128	45	47514	263911	117651	6	26	26B	19A	19	667	PCV13	NVT		2007.3	2007	E2	E2B	5y	Pd
ERR907803_G3_23B_2007	ERR907803	2080807	27	77066.9	406289	131269	5	09	09	23B	23	1448	NVT	NVT		2007.6	2007	E2	E2B	3y	Pd
ERR907804_G3_23B_2007	ERR907804	2080603	23	90461	582376	231098	3	09	09	23B	23	1448	NVT	NVT		2007.6	2007	E2	E2B	4y	Pd
ERR907805_G3_3_2007	ERR907805	2015405	18	111967	406220	371037	3	02	02A	3	3	180	PCV13	NVT	Netherlands3-31	2007.3	2007	E2	E2B	5y	Pd
ERR907806_G3_1_2007	ERR907806	2095265	57	36759	132934	91698	10	27	27	1	1	227	PCV13	NVT		2007.6	2007	E2	E2B	2y	Pd
ERR907807_G4_38_2007	ERR907807	2121920	62	34224.5	160521	59523	11	27	27	38	38	393	NVT	NVT		2007.3	2007	E2	E2B	4y	Pd
ERR907808_G3_22A_2007	ERR907808	2053187	26	78968.7	476764	119037	4	13	13	22A	22	433	NVT	NVT		2007.3	2007	E2	E2B	2y	Pd
ERR907809_G4_23A_2007	ERR907809	2124148	36	59004.1	246004	128974	6	24	24	23A	23	338	NVT	NVT	Colombia23F-26	2007.6	2007	E2	E2B	<6m	Pd
ERR907810_G4_5_2007	ERR907810	2072517	32	64766.2	324882	152770	5	21	21	6C	6	4509	NVT	NVT		2007.3	2007	E2	E2B	6-<12m	Pd
ERR907811_G4_23B_2007	ERR907811	2133696	41	52041.4	401238	210422	4	09	09	23B	23	439	NVT	NVT		2007.3	2007	E2	E2B	<6m	Pd
ERR907812_G2_7C_2007	ERR907812	2065391	37	55821.4	396013	109733	5	04	04A	7C	7	3162	NVT	NVT		2007.6	2007	E2	E2B	50-64y	Ad
ERR907813_G3_19A_2007	ERR907813	2072691	36	57574.8	254646	122215	7	26	26B	19A	19	199	PCV13	NVT		2007.8	2007	E2	E2B	<6m	Pd
ERR907814_G3_10A_2007	ERR907814	2056595	39	52733.2	263357	126965	6	16	16B	10A	10	816	NVT	NVT		2007.8	2007	E2	E2B	4y	Pd
ERR907815_G2_23A_2007	ERR907815	2051664	25	82066.6	416747	175461	4	09	09	23A	23	438	NVT	NVT		2007.8	2007	E2	E2B	18-49y	Ad
ERR907816_G2_5_2007	ERR907816	2073176	38	54557.3	192915	133577	7	27	27	5	5	289	PCV13	NVT	Colombia5-19	2007.8	2007	E2	E2B	8y	Ad
ERR907817_G2_15C_2007	ERR907817	2154846	36	59856.8	258481	126017	6	25	25	15C	15	3065	NVT	NVT		2007.4	2007	E2	E2B	18-49y	Ad
ERR907818_G2_23B_2007	ERR907818	2125291	30	70843	396549	190080	4	09	09	23B	23	439	NVT	NVT		2007.8	2007	E2	E2B	18-49y	Ad
ERR907819_G4_38_2007	ERR907819	2123245	68	31224.2	154163	54481	12	27	27	38	38	393	NVT	NVT		2007.4	2007	E2	E2B	12-<24m	Pd
ERR907820_G3_35B_2007	ERR907820	2087316	39	53520.9	265828	118421	5	23	23	35B	15	162	NVT	NVT		2007.9	2007	E2	E2B	2y	Pd
ERR907821_G2_35B_2007	ERR907821	2087545	33	63258.9	597598	189956	3	23	23	35B	15	162	NVT	NVT		2007.9	2007	E2	E2B	18-49y	Ad
ERR907822_G2_35B_2007	ERR907822	2087159	34	61387	382940	133726	4	23	23	35B	15	162	NVT	NVT		2008	2007	E2	E2B	7y	Ad
ERR907823_G3_10A_2007	ERR907823	2056302	35	58751.5	302757	128376	6	16	16B	10A	10	816	NVT	NVT		2008	2007	E2	E2B	4y	Pd
ERR907824_G3_19A_2007	ERR907824	2103273	37	56845.2	315240	125273	6	26	26B	19A	19	199	PCV13	NVT		2007.9	2007	E2	E2B	2y	Pd
ERR907825_G4_12B_2007	ERR907825	1970743	36	54742.9	314626	92803	7	27	27	12B	12	220	NVT	NVT	Denmark12F-24	2007.1	2007	E2	E2B	6-<12m	Pd
ERR907826_G4_16F_2007	ERR907826	2142796	42	51018.9	405217	118290	6	14	14	16F	16	1840	NVT	NVT		2007.2	2007	E2	E2B	4y	Pd
ERR907827_G4_15A_2007	ERR907827	2089117	50	41782.3	183662	86383	9	15	15	15A	15	817	NVT	NVT		2007.2	2007	E2	E2B	5y	Pd
ERR907828_G4_37_2007	ERR907828	1989412	25	79576.5	257609	172276	5	03	03B	37	37	1367	NVT	NVT		2007.6	2007	E2	E2B	12-<24m	Pd
ERR907829_G4_23A_2007	ERR907829	2086962	44	47430.9	213601	92680	8	24	24	23A	23	338	NVT	NVT	Colombia23F-26	2007.6	2007	E2	E2B	3y	Pd
ERR907830_G4_3_2007	ERR907830	2013748	23	87554.3	299013	168287	5	02	02A	3	3	180	PCV13	NVT	Netherlands3-31	2007.6	2007	E2	E2B	6-<12m	Pd
ERR907831_G4_17F_2007	ERR907831	2061806	44	46859.2	206866	87626	8	06	06B	17F	17	392	NVT	NVT		2007.6	2007	E2	E2B	5y	Pd
ERR907832_G2_7C_2007	ERR907832	2066903	40	51672.6	396755	122221	5	04	04A	7C	7	3162	NVT	NVT		2007.6	2007	E2	E2B	6y	Ad
ERR907833_G3_6B_2007	ERR907833	2064490	28	73731.8	395474	130832	5	18	18	6C	6	1292	NVT	NVT		2007.6	2007	E2	E2B	2y	Pd
ERR907834_G4_7F_2007	ERR907834	1991122	49	40635.1	179279	77405	9	27	27	7F	7	191	PCV13	NVT	Netherlands7F-39	2007.6	2007	E2	E2B	5y	Pd
ERR907835_G2_7B_2007	ERR907835	2127419	35	60783.4	256633	142741	6	26	26A	7B	7	1757	NVT	NVT		2007.6	2007	E2	E2B	18-49y	Ad
ERR907836_G3_23A_2007	ERR907836	2122874	37	57375	213459	97046	7	24	24	23A	23	338	NVT	NVT	Colombia23F-26	2007.7	2007	E2	E2B	2y	Pd
ERR907837_G3_19A_2007	ERR907837	2053250	37	55493.2	265162	119080	6	26	26B	19A	19	2220	PCV13	NVT		2007.7	2007	E2	E2B	2y	Pd
ERR907838_G3_7B_2007	ERR907838	2088061	33	63274.6	353375	131580	5	26	26A	7B	7	1757	NVT	NVT		2007.7	2007	E2	E2B	2y	Pd
ERR907839_G2_19A_2007	ERR907839	2052653	36	57018.1	362612	128611	6	26	26B	19A	19	2220	PCV13	NVT		2007.7	2007	E2	E2B	6y	Ad
ERR907840_G3_19A_2007	ERR907840	2053792	39	52661.3	262510	107982	7	26	26B	19A	19	2220	PCV13	NVT		2007.7	2007	E2	E2B	12-<24m	Pd
ERR907841_G2_35B_2007	ERR907841	2139657	50	42793.1	195319	86172	10	08	08	35B	35	452	NVT	NVT		2007.7	2007	E2	E2B	6y	Ad
ERR907842_G2_35B_2007	ERR907842	2061312	49	42067.6	196566	71123	10	08	08	35B	35	452	NVT	NVT		2007.7	2007	E2	E2B	6y	Ad
ERR907843_G3_7C_2007	ERR907843	2066383	34	60776	450421	151133	4	04	04A	7C	7	3162	NVT	NVT		2007.7	2007	E2	E2B	3y	Pd
ERR907844_G3_23B_2007	ERR907844	2133370	28	76191.8	455398	199512	4	09	09	23B	23	439	NVT	NVT		2007.7	2007	E2	E2B	3y	Pd
ERR907845_G2_19A_2007	ERR907845	2052667	44	46651.5	257532	112986	7	26	26B	19A	19	2220	PCV13	NVT		2007.7	2007	E2	E2B	18-49y	Ad
ERR907846_G2_34_2007	ERR907846	2151153	57	37739.5	334463	146328	5	20	20	34	34	547*	NVT	NVT		2007.7	2007	E2	E2B	18-49y	Ad
ERR907847_G3_23B_2007	ERR907847	2084682	25	83387.3	412942	190367	4	09	09	23B	23	1847	NVT	NVT		2007.7	2007	E2	E2B	12-<24m	Pd
ERR907848_G2_19A_2007	ERR907848	2056104	38	54108	263898	122433	6	26	26B	19A	19	199	PCV13	NVT		2007.7	2007	E2	E2B	18-49y	Ad
ERR907849_G2_23A_2007	ERR907849	2088665	39	53555.5	289072	103394	6	24	24	23A	23	338	NVT	NVT	Colombia23F-26	2007.7	2007	E2	E2B	18-49y	Ad
ERR907850_G3_35B_2007	ERR907850	2005203	27	74266.8	202378	123616	6	11	11	35B	35	558	NVT	NVT		2007.7	2007	E2	E2B	4y	Pd
ERR907851_G2_35B_2007	ERR907851	2003643	30	66788.1	257996	90818	7	11	11	35B	35	558	NVT	NVT		2007.7	2007	E2	E2B	50-64y	Ad
ERR907852_G3_23B_2007	ERR907852	2132124	30	71070.8	325713	125117	5	09	09	23B	23	439	NVT	NVT		2007.8	2007	E2	E2B	12-<24m	Pd
ERR907853_G3_6B_2007	ERR907853	2065441	34	60748.3	263386	129961	6	18	18	6C	6	1292	NVT	NVT		2007.8	2007	E2	E2B	4y	Pd
ERR907854_G3_31_2007	ERR907854	2041289	41	49787.5	247725	87442	7	05	05	31	31	1111	NVT	NVT		2007.8	2007	E2	E2B	<6m	Pd
ERR907855_G2_23B_2007	ERR907855	2125808	27	78733.6	340161	206462	4	09	09	23B	23	439	NVT	NVT		2007.8	2007	E2	E2B	18-49y	Ad
ERR907856_G2_35A_2007	ERR907856	2040988	22	92772.2	393067	240537	4	07	07	35A	35	4518	NVT	NVT		2007.9	2007	E2	E2B	18-49y	Ad
ERR907857_G3_3_2007	ERR907857	1986867	19	104572	309070	204270	4	02	02A	3	3	1119	PCV13	NVT		2007.9	2007	E2	E2B	2y	Pd
ERR907858_G3_35A_2007	ERR907858	2042742	24	85114.2	480617	300909	3	07	07	35A	35	4518	NVT	NVT		2007.9	2007	E2	E2B	3y	Pd
ERR907859_G2_7B_2007	ERR907859	2085001	30	69500	315988	181834	5	26	26A	7B	7	1757	NVT	NVT		2008	2007	E2	E2B	50-64y	Ad
ERR907860_G3_19A_2008	ERR907860	2060451	36	57234.8	263978	112739	6	26	26B	19A	19	199	PCV13	NVT		2008	2008	E2	E2B	2y	Pd
ERR907861_G3_35B_2008	ERR907861	2087795	39	53533.2	310286	168811	5	23	23	35B	15	162	NVT	NVT		2008	2008	E2	E2B	6-<12m	Pd
ERR907862_G2_37_2008	ERR907862	2006787	46	43625.8	252799	70313	8	27	27	37	37	447*	NVT	NVT		2008	2008	E2	E2B	18-49y	Ad
ERR907863_G2_35B_2008	ERR907863	2003793	34	58935.1	202974	94257	8	11	11	35B	35	558	NVT	NVT		2008	2008	E2	E2B	18-49y	Ad
ERR907864_G3_35B_2008	ERR907864	2074260	34	61007.7	462803	193388	4	23	23	35B	15	162	NVT	NVT		2008	2008	E2	E2B	<6m	Pd
ERR907865_G4_23A_2006	ERR907865	2087401	34	61394.2	288436	102914	7	24	24	23A	23	338	NVT	NVT	Colombia23F-26	2006.8	2006	E2	E2A	3y	Pd
ERR907866_G2_11D_2007	ERR907866	2014408	27	74607.7	268693	171053	5	03	03A	11D	11	62	NVT	NVT		2007.6	2007	E2	E2B	65+y	Ad
ERR907867_G3_34_2007	ERR907867	2082005	23	90522	356195	225235	4	20	20	34	34	547	NVT	NVT		2007.5	2007	E2	E2B	4y	Pd
ERR907868_G4_34_2007	ERR907868	2082770	24	86782.1	465593	213948	4	20	20	34	34	547	NVT	NVT		2007.5	2007	E2	E2B	6-<12m	Pd
ERR907869_G2_19A_2007	ERR907869	2049676	37	55396.7	255744	119147	6	26	26B	19A	19	2220	PCV13	NVT		2007.7	2007	E2	E2B	7y	Ad
ERR907870_G2_17F_2008	ERR907870	2002494	22	91022.4	414458	225075	3	19	19B	17F	17	1794	NVT	NVT		2008	2008	E2	E2B	50-64y	Ad
ERR907871_G3_23A_2007	ERR907871	2102785	30	70092.8	213471	147134	6	24	24	23A	23	338	NVT	NVT	Colombia23F-26	2007.5	2007	E2	E2B	6-<12m	Pd
ERR907872_G3_38_2007	ERR907872	2122051	74	28676.4	175748	52406	13	27	27	38	38	393	NVT	NVT		2007.7	2007	E2	E2B	12-<24m	Pd
ERR907873_G3_23A_2007	ERR907873	2100722	38	55282.2	213498	110716	7	24	24	23A	23	338	NVT	NVT	Colombia23F-26	2007.5	2007	E2	E2B	4y	Pd
ERR907874_G3_10B_2007	ERR907874	2056775	31	66347.6	263982	136635	5	16	16B	10B	10	816	NVT	NVT		2007.9	2007	E2	E2B	2y	Pd
ERR907875_G3_15C_2007	ERR907875	2121656	36	58934.9	354177	131540	5	26	26A	15C	15	1757	NVT	NVT		2007.7	2007	E2	E2B	2y	Pd
ERR907876_G3_22A_2008	ERR907876	2061045	35	58887	260238	85029	7	13	13	22A	22	433	NVT	NVT		2008.2	2008	E2	E2B	2y	Pd
ERR907877_G3_19A_2008	ERR907877	2056681	41	50162.9	298107	112641	6	26	26B	19A	19	199	PCV13	NVT		2008.1	2008	E2	E2B	6-<12m	Pd
ERR907878_G3_15A_2007	ERR907878	2038438	28	72801.4	302186	129787	6	19	19A	15A	15	3058	NVT	NVT		2007.8	2007	E2	E2B	<6m	Pd
ERR907879_G3_15C_2007	ERR907879	2067057	40	51676.4	244583	114948	7	26	26A	15C	15	4528	NVT	NVT		2007.8	2007	E2	E2B	2y	Pd
ERR907880_G3_15A_2007	ERR907880	2036270	31	65686.1	306274	116363	6	19	19A	15A	15	3058	NVT	NVT		2007.6	2007	E2	E2B	2y	Pd
ERR907881_G3_10A_2007	ERR907881	2062749	39	52891	242658	89510	8	02	02B	10A	10	1263	NVT	NVT		2007.7	2007	E2	E2B	2y	Pd
ERR907882_G3_15A_2007	ERR907882	2033114	48	42356.5	194504	69998	9	15	15	15A	15	817	NVT	NVT		2007.9	2007	E2	E2B	12-<24m	Pd
ERR907883_G3_35B_2007	ERR907883	2003577	36	55654.9	158407	89725	8	11	11	35B	35	558	NVT	NVT		2007.9	2007	E2	E2B	12-<24m	Pd
ERR907884_G3_15A_2007	ERR907884	2047708	51	40151.1	198602	77077	10	15	15	15A	15	817	NVT	NVT		2007.4	2007	E2	E2B	<6m	Pd
ERR907885_G3_6B_2006	ERR907885	2041729	24	85072	518655	210429	4	18	18	6C	6	2064	NVT	NVT		2006.5	2006	E2	E2A	12-<24m	Pd
ERR907886_G3_34_2006	ERR907886	2111008	27	78185.5	340939	184044	5	20	20	34	34	547	NVT	NVT		2006.7	2006	E2	E2A	12-<24m	Pd
ERR907887_G3_35A_2006	ERR907887	2091860	33	63389.7	559678	264396	3	07	07	35A	35	4505	NVT	NVT		2006.8	2006	E2	E2A	4y	Pd
ERR907888_G3_19A_2007	ERR907888	2101147	39	53875.6	365519	182251	4	26	26B	19A	19	199	PCV13	NVT		2007	2007	E2	E2B	12-<24m	Pd
ERR907889_G3_35B_2007	ERR907889	2103085	47	44746.5	196510	75458	9	08	08	35B	35	452	NVT	NVT		2007.4	2007	E2	E2B	6-<12m	Pd
